# Supplementary material for: High-throughput computational screening of novel MA2Z4-type Janus structures with excellent photovoltaic and photocatalytic properties
Source: Royal Society of Chemistry journal article supplement (doi:10.1039/d4ta07195f), 2024-01-01
Supplement: d4ta07195f1.pdf [file d4ta07195f1.pdf]

## Supplementary Information

# High-throughput computational screening of novel MA<sub>2</sub>Z<sub>4</sub>-type Janus structures with excellent photovoltaic and photocatalytic properties

Yongli Yang<sup>1,2</sup>, Yadong Yu<sup>2\*</sup>, Zhe Liu<sup>2\*</sup>, Lijun Shang<sup>1</sup>, Pan Xiang<sup>2</sup>, Yu Xin<sup>2</sup>, Tong Zhang<sup>2</sup>,  
Zhonglu Guo<sup>1\*</sup>, Mengyan Dai<sup>2\*</sup>

<sup>1</sup>Hebei Key Laboratory of Boron Nitride Micro and Nano Materials, School of Materials Science and Engineering, Hebei University of Technology, Tianjin 300130, China

<sup>2</sup>Chemical Defense Institute, Academy of Military Sciences, Beijing 102205, China

\*Corresponding Authors: [yuyadong36@163.com](mailto:yuyadong36@163.com) (Yadong Yu), [zheliu\\_academia@hotmail.com](mailto:zheliu_academia@hotmail.com) (Zhe Liu), [zlguo@hebut.edu.cn](mailto:zlguo@hebut.edu.cn) (Zhonglu Guo), [daidecai0558@163.com](mailto:daidecai0558@163.com) (Mengyan Dai)

### Calculation details

The formation energy is calculated as follows

$$E_f = \frac{E_{total} - \sum_i n_i \mu_i}{\sum_i n_i} \quad S(1)$$

where  $E_{total}$  represents the total energy of the structure in a unit cell,  $n_i$  represents the number of the  $i$ th atom, and  $\mu_i$  is the cohesion energy contained in the  $i$ th atom. The formation energies obtained are shown in the following table S1.

Phonon dispersion calculations based on VASP-DFPT (Density Functional Perturbation Theory)<sup>1, 2</sup> are used to investigate their dynamic stability (both MA<sub>2</sub>Z<sub>4</sub> are 4 × 4 × 1 supercells). The phonon dispersion curve is shown in Figure S1S2.

The thermal stability of the MA<sub>2</sub>Z<sub>4</sub> structure was evaluated by performing ab initio arithmetic molecular dynamics (AIMD)<sup>1</sup> simulations at 300 K, where sufficiently large supercells containing more than 100 atoms were used to reduce lattice translation constraints. The system was stabilized at 300 K for 5 ps with a time step of 2 fs and the Nosè algorithm was used to control the temperature.

Carrier mobility is estimated by means of the deformation potential (DP) theory defined below:

$$\mu_{2D} = \frac{2e\hbar^3 C_{2D}}{3k_B T |m^*|^2 E_i^2} \quad S(2)$$

where  $e$ ,  $\hbar$ ,  $k_B$  and  $T$  are the electron charge, the approximate Planck constant, the Boltzmann constant and the temperature (300 K), respectively.  $C_{2D}$  is the modulus of elasticity under uniaxial strain along the strain direction, calculated as follows:

$$C_{2D} = [\partial^2 E / \partial (\Delta a / a_0)^2] / S_0 \quad S(3)$$

where  $S_0$  is the equilibrium area.  $E_i$  is the strain-induced band-edge energy of the CBM of the electron and the VBM of the hole, calculated as follows:

$$E_i = \partial E_{edge} / \partial (\Delta a / a_0) \quad S(4)$$

where  $E_{edge}$  is the band edge energy of CBM for electrons and VBM for holes induced by uniaxial strain.  $m^*$  is the effective mass of the carrier, calculated as follows:

$$m^* = \hbar^2 / (\partial^2 E / \partial k^2) \quad S(5)$$

The work function is the minimum amount of energy that must be supplied to cause an electron to immediately escape from a solid surface. The defining formula for the work function is:

$$W = -e\Phi - E_F \quad S(6)$$

where  $-e$  is the charge of an electron,  $\Phi$  is the electrostatic potential in the vacuum nearby the surface, and  $E_F$  is the Fermi level (electrochemical potential of electrons) inside the material.

The investigation of optical properties begins with the calculation of the material's dielectric function  $\varepsilon(\omega)$  as follows<sup>3</sup>:

$$\varepsilon(\omega) = \varepsilon_1(\omega) + i\varepsilon_2(\omega) \quad S(7)$$

where  $\varepsilon_1(\omega)$  and  $\varepsilon_2(\omega)$  are the real and imaginary parts of the dielectric function, and  $\omega$  is the photon frequency. The imaginary part of the dielectric function  $\varepsilon_2(\omega)$  was obtained from the following equation:

$$\varepsilon_2(\omega) = \frac{4\pi^2 e^2}{\Omega} \lim_{q \rightarrow 0} \frac{1}{q^2} \times \sum_{c,v,k} 2w_k \delta(E_c - E_v - \omega) |\langle c | \mathbf{e} \cdot \mathbf{q} | v \rangle|^2 \quad S(8)$$

where  $\langle c | \mathbf{e} \cdot \mathbf{q} | v \rangle$  is the integrated optical transitions from the valence states ( $v$ ) to the conduction states ( $c$ ),  $\mathbf{e}$  is the polarization direction of the photon and  $\mathbf{q}$  is the electron momentum operator. The integration over  $\mathbf{k}$  is performed by summation over special kpoints with a corresponding weighting factor  $w_k$ . The real part of the dielectric function  $\varepsilon_1(\omega)$  can be determined from the Kramers-Kronig relation given by:

$$\varepsilon_1(\omega) = 1 + \frac{2}{\pi} P \int_0^\infty \frac{\varepsilon_2(\omega') \omega'}{\omega^2 - \omega'^2 + i\eta} d\omega' \quad S(9)$$

where  $P$  denotes the principle value and  $\eta$  is the complex shift parameter.

Absorption coefficient  $\alpha(\omega)$  can be calculated from the real  $\varepsilon_1(\omega)$  and the imaginary  $\varepsilon_2(\omega)$  parts:

$$\alpha(\omega) = \sqrt{2} \omega \left( \sqrt{\varepsilon_1^2(\omega) + \varepsilon_2^2(\omega)} - \varepsilon_1(\omega) \right)^{\frac{1}{2}} \quad S(10)$$

Additionally, in order to obtain the more accurate optical absorption of 2D materials, the optical absorption rate was calculated as follows:

$$A = \frac{\text{Re } \tilde{\sigma}}{|1 + \tilde{\sigma}/2|^2} \quad S(11)$$

Where  $R = \left| \frac{\tilde{\sigma}/2}{1 + \tilde{\sigma}/2} \right|^2$  is the normalized reflectance,  $\tilde{\sigma}(\omega) = \sigma_{2D}(\omega)/\varepsilon_0 c$  is the normalized conductivity.  $\sigma_{2D}(\omega)$  denotes the in-plane 2D optical conductivity, which directly related to the corresponding  $\sigma_{3D}(\omega)$  component through the equation of  $\sigma_{2D}(\omega) = L\sigma_{3D}(\omega)$ , where L is the slab thickness in the simulation cell, and 3D optical conductivity was obtained from  $\sigma_{3D}(\omega) = i[1 - \varepsilon(\omega)]\varepsilon_0 \omega$  base on the Maxwell equation. For  $\varepsilon(\omega)$ ,  $\varepsilon_0$ , and  $\omega$ , they are the frequency-dependent complex dielectric function, permittivity of vacuum, and frequency of the incident wave, respectively.

For hydrogen evolution reaction (HER), the reaction equation at PH=0 is as follows:

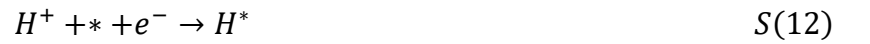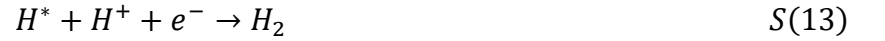

where \* denotes the active site on the surface of the structure, H\* denotes the hydrogen atoms on the surface of the adsorbed structure. The calculation of Gibbs free energy ( $\Delta G_{H^*}$ ) under acidic conditions is as follows<sup>4</sup>:

$$\Delta G_{H^*} = \Delta E + \Delta E_{ZPE} - T\Delta S \quad S(14)$$

Therein  $\Delta E$  denotes the energy difference between the hydrogen adsorption state and the independent state,  $\Delta E_{ZPE}$  denotes the zero-point energy difference,  $\Delta S$  denotes the entropy value difference, and T denotes the temperature (298.15 K).

The  $\Delta G_{H^*}$  under the influence of different PH were calculated separately with the following equations:

$$\Delta G_{H^*} = G_{H^*} - 1/2G_{H_2} - G^* + 0.059 \times pH - eU \quad S(15)$$

where  $0.059 \times pH$  is the free energy contribution under the effect of pH, eU denotes the influence of extra potential bias provided by the electrons or holes, and U is the electrode potential relative to the standard hydrogen electrode (SHE).

# Supporting Figures

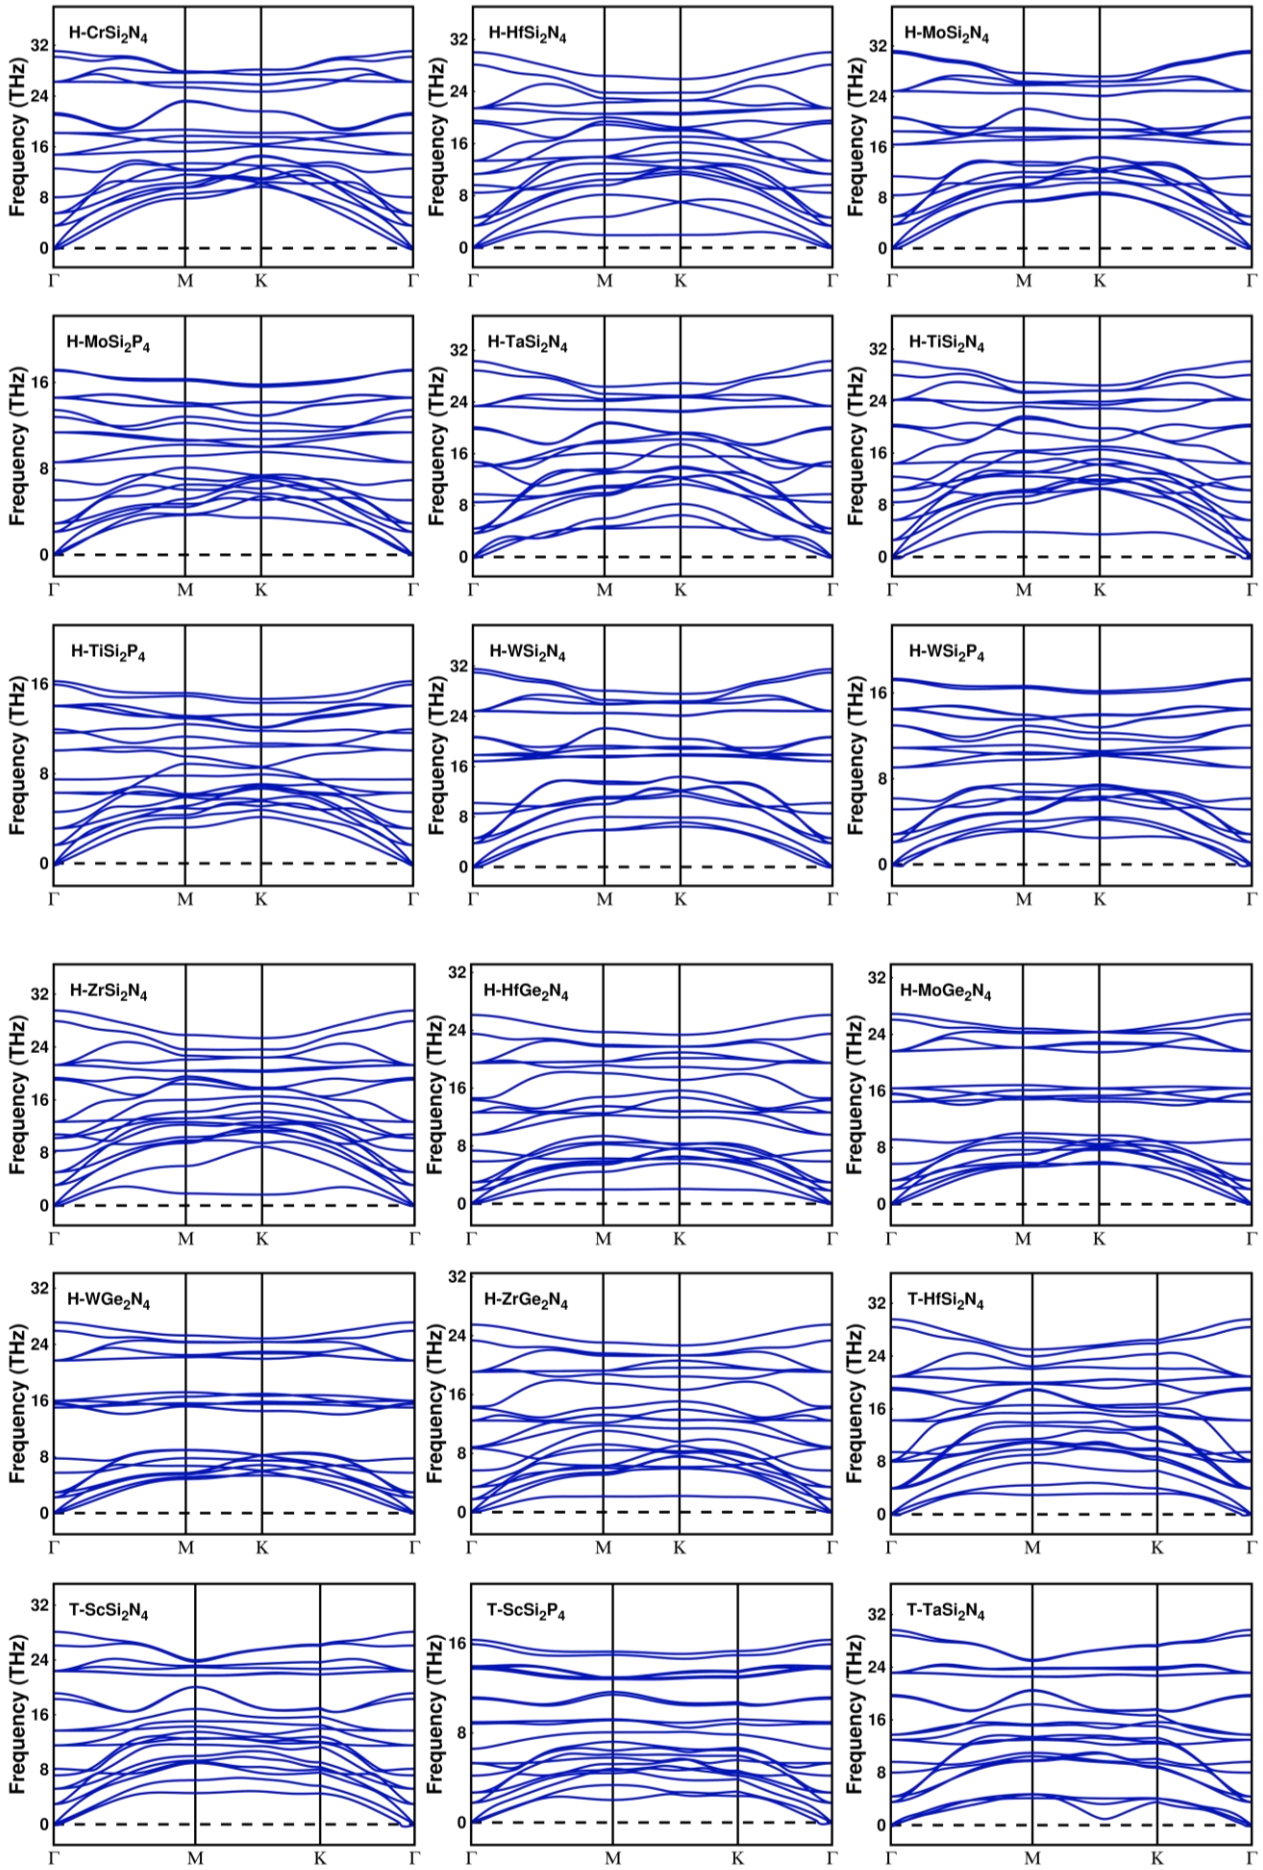



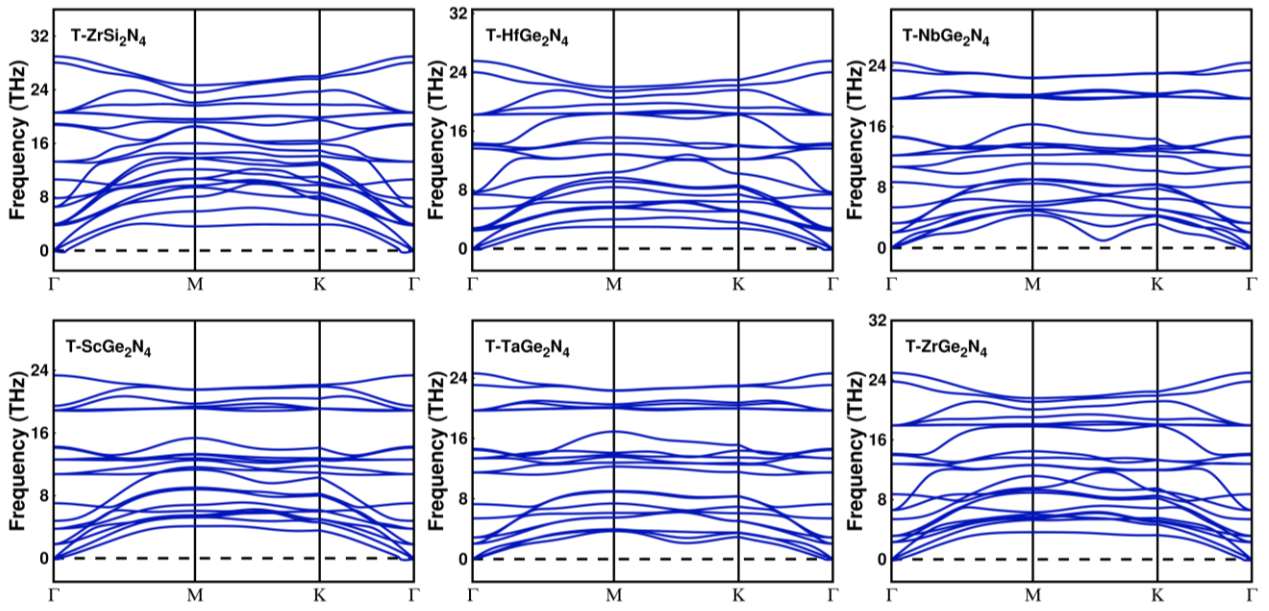

Fig. S1 Phonon dispersion curves for the symmetric structure of  $MA_2Z_4$ .

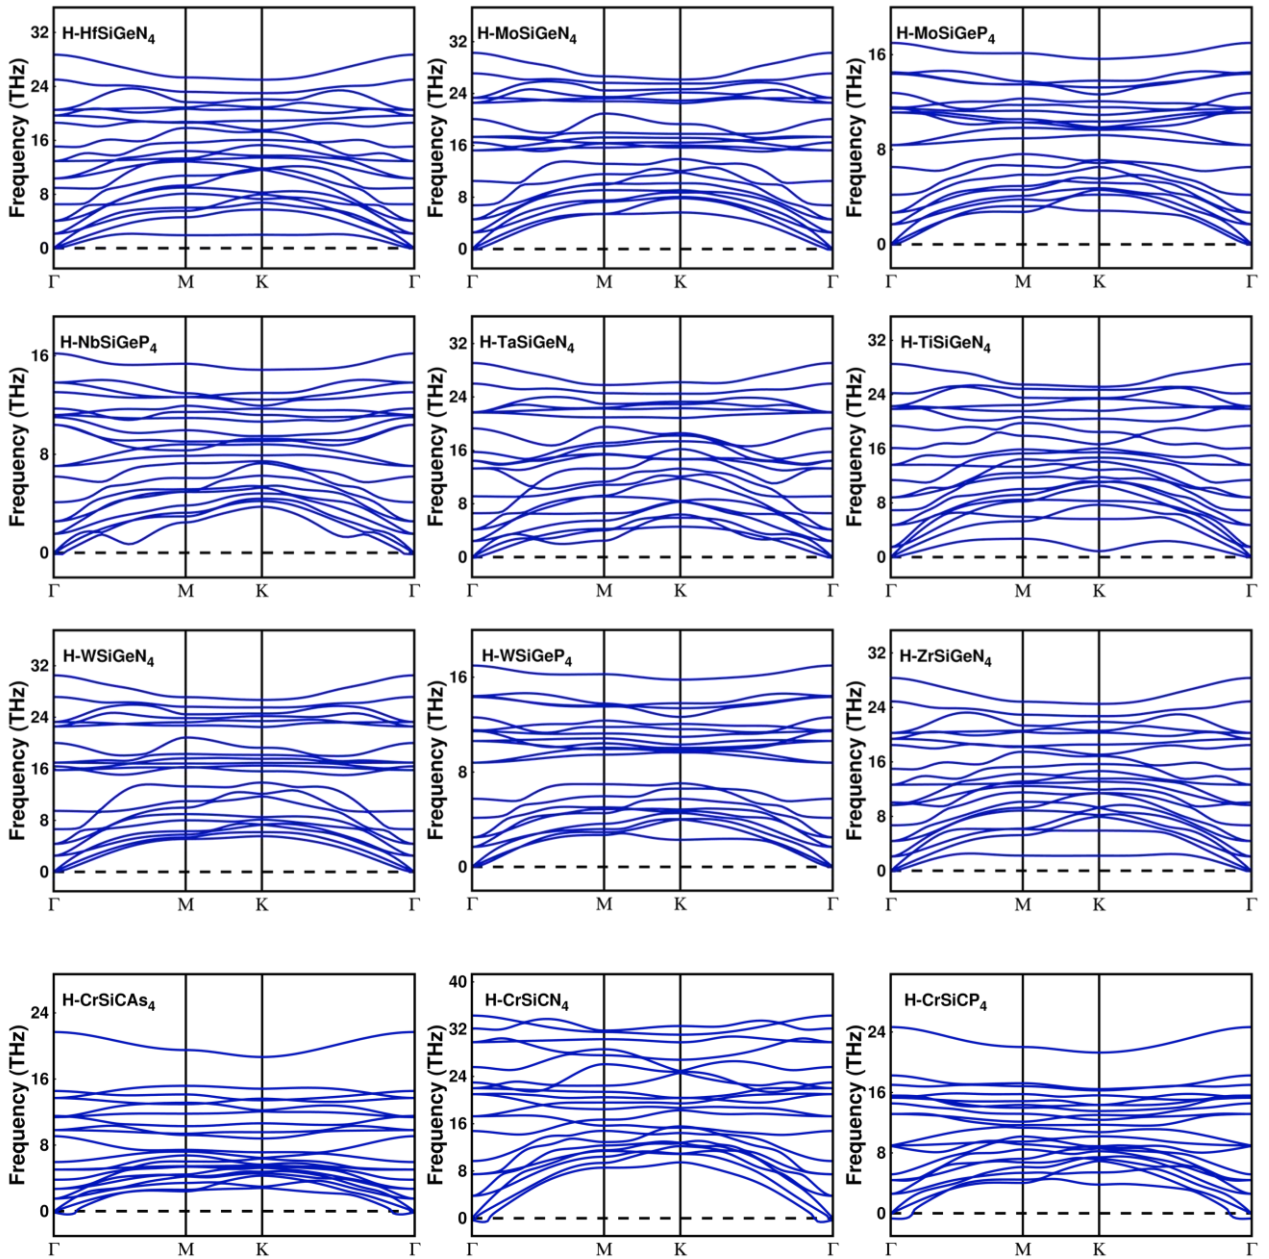

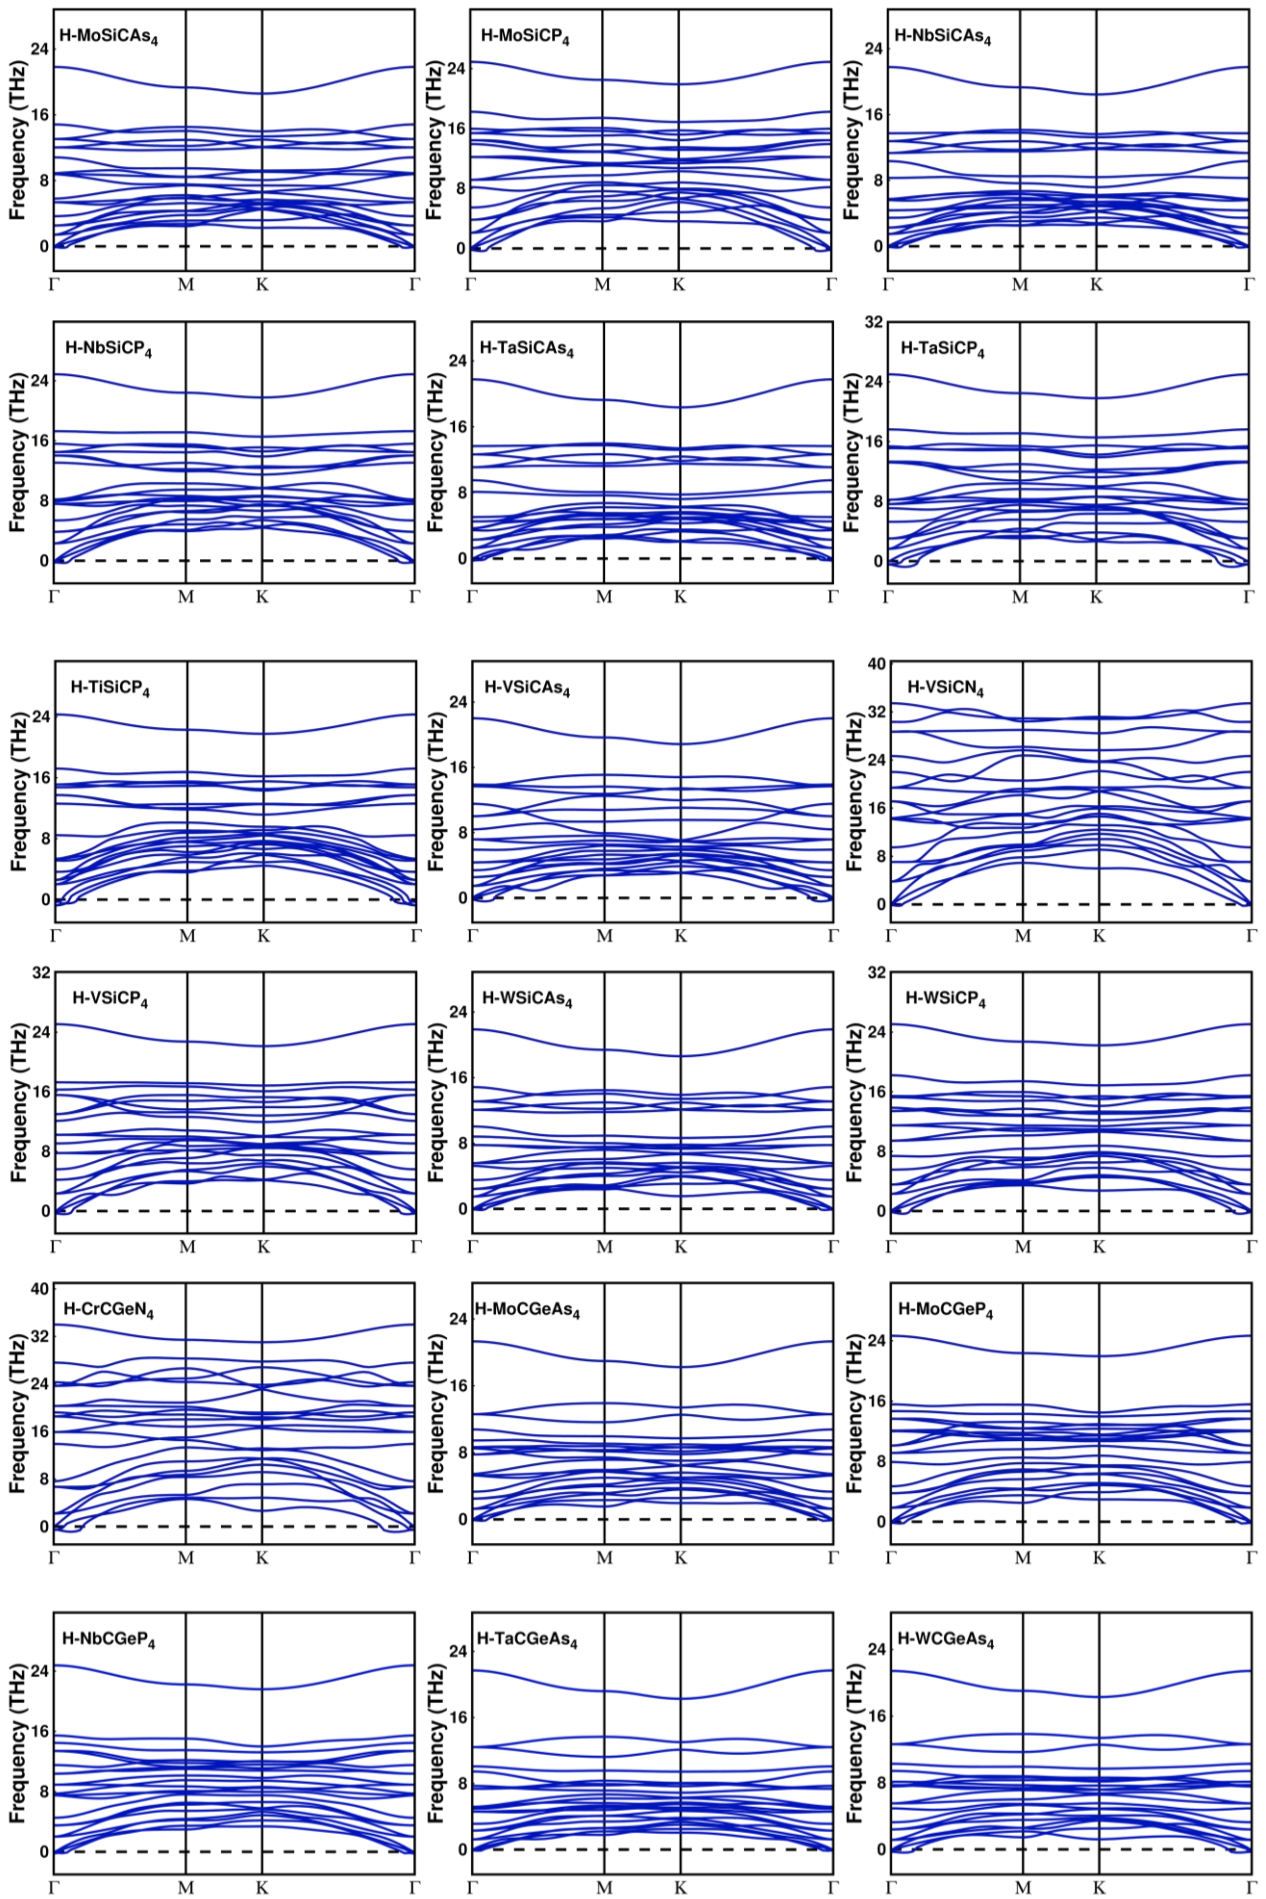

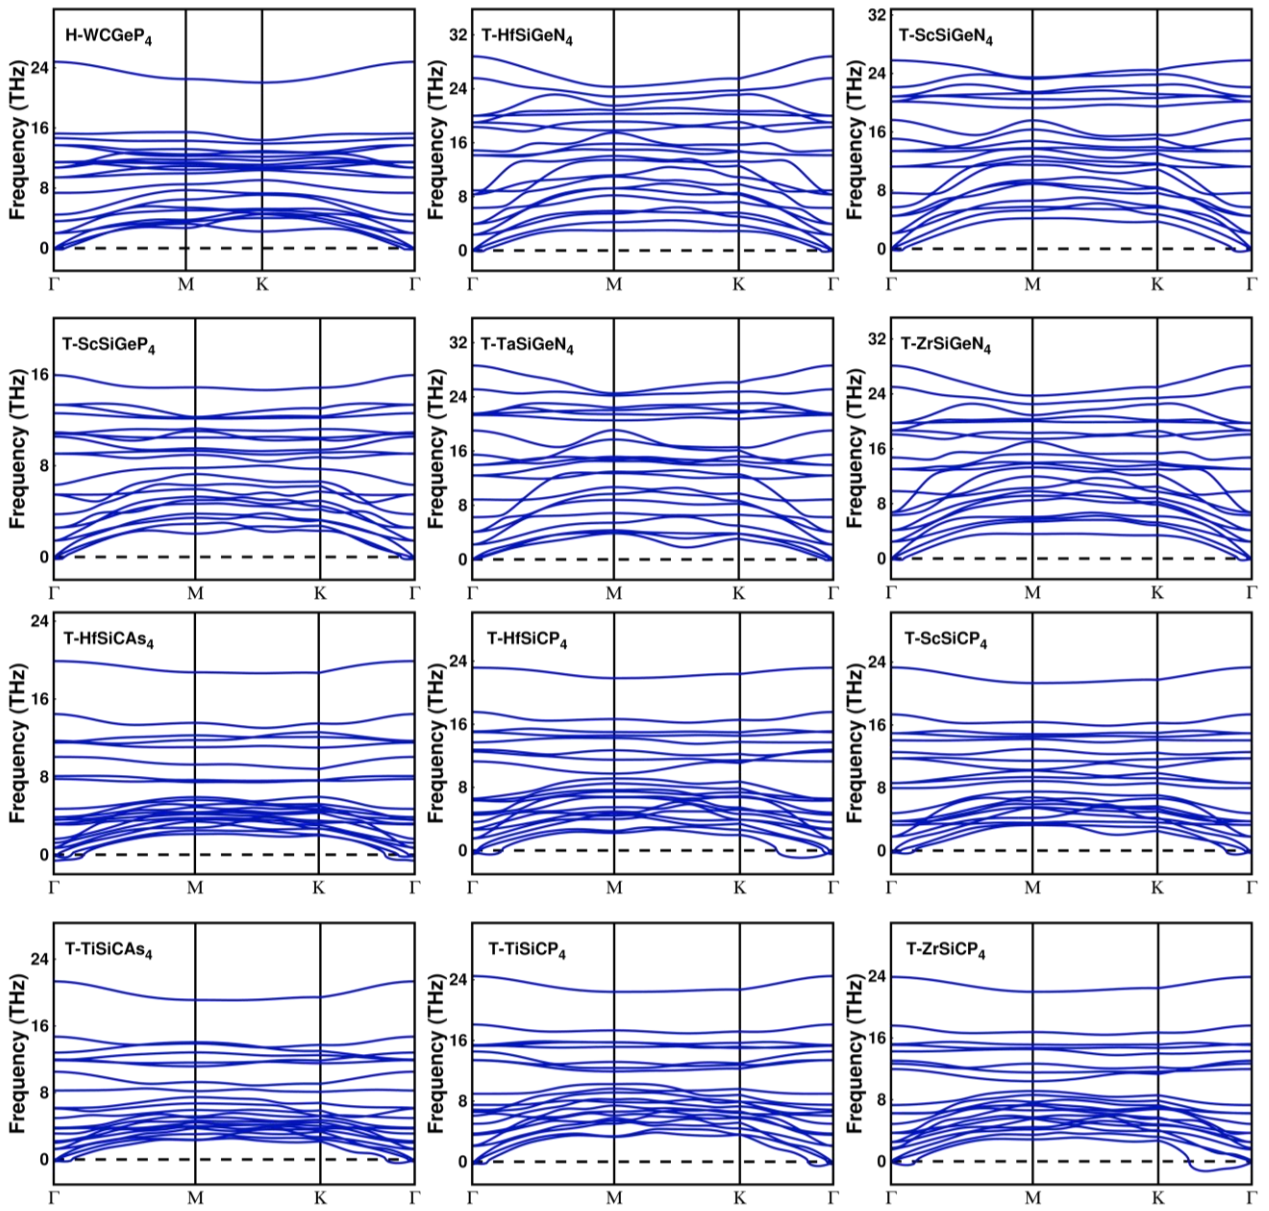

Fig. S2 Phonon dispersion curves for the asymmetric Janus structure of  $MA_2Z_4$ .



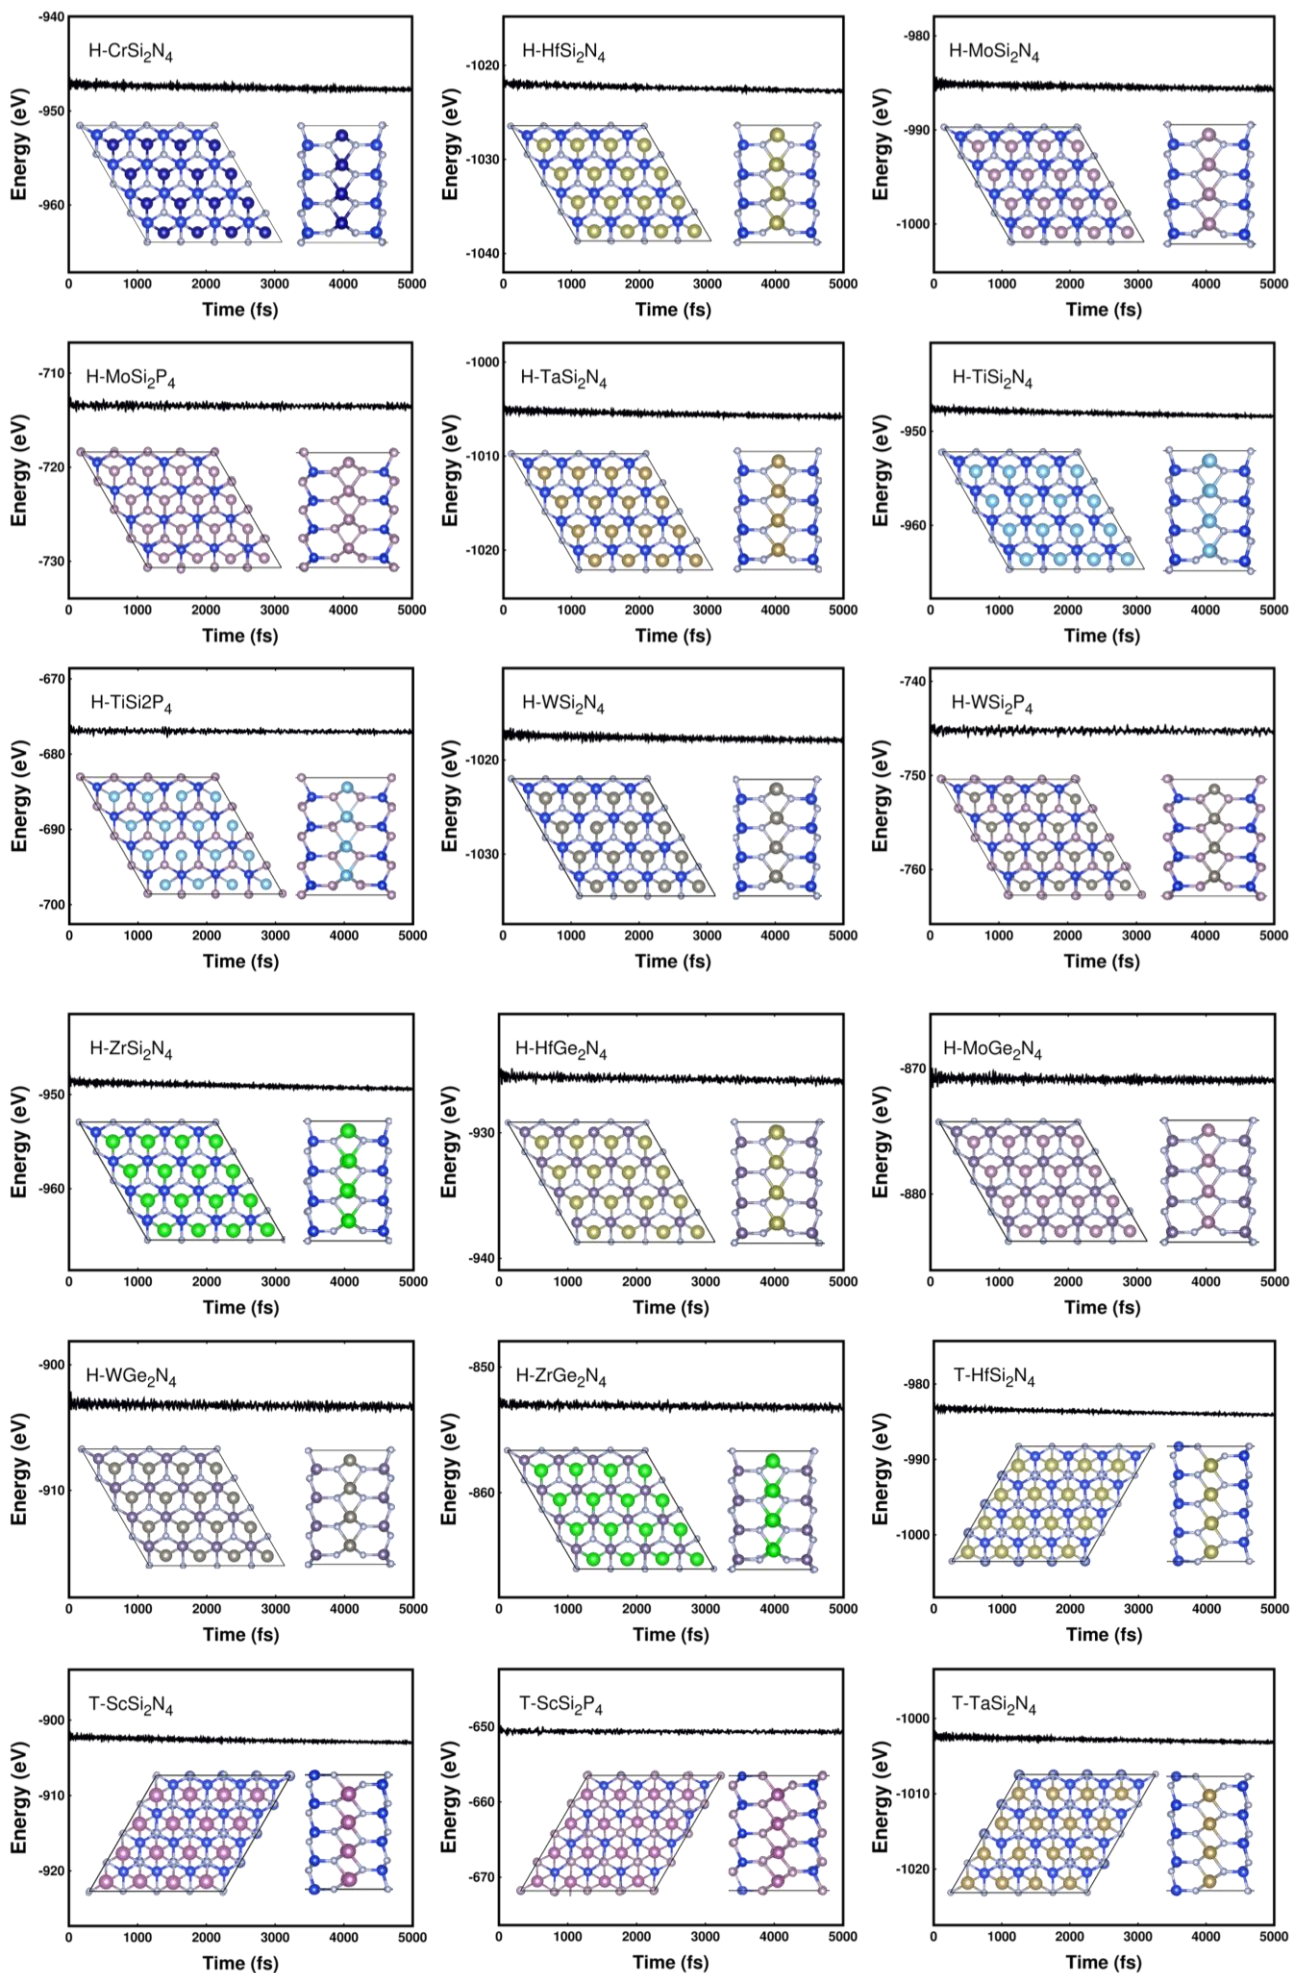

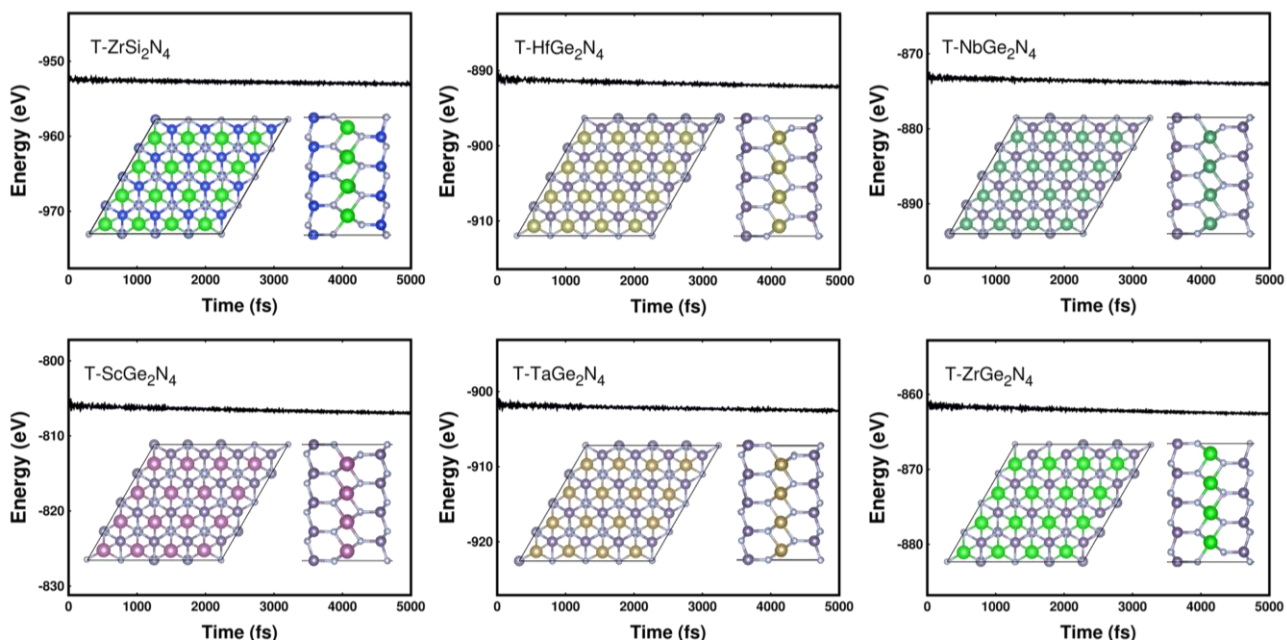

Fig. S3 Total potential energy and corresponding snapshots of symmetric  $MA_2Z_4$  after 5 ps stabilization at 300 K obtained in AIMD simulations.

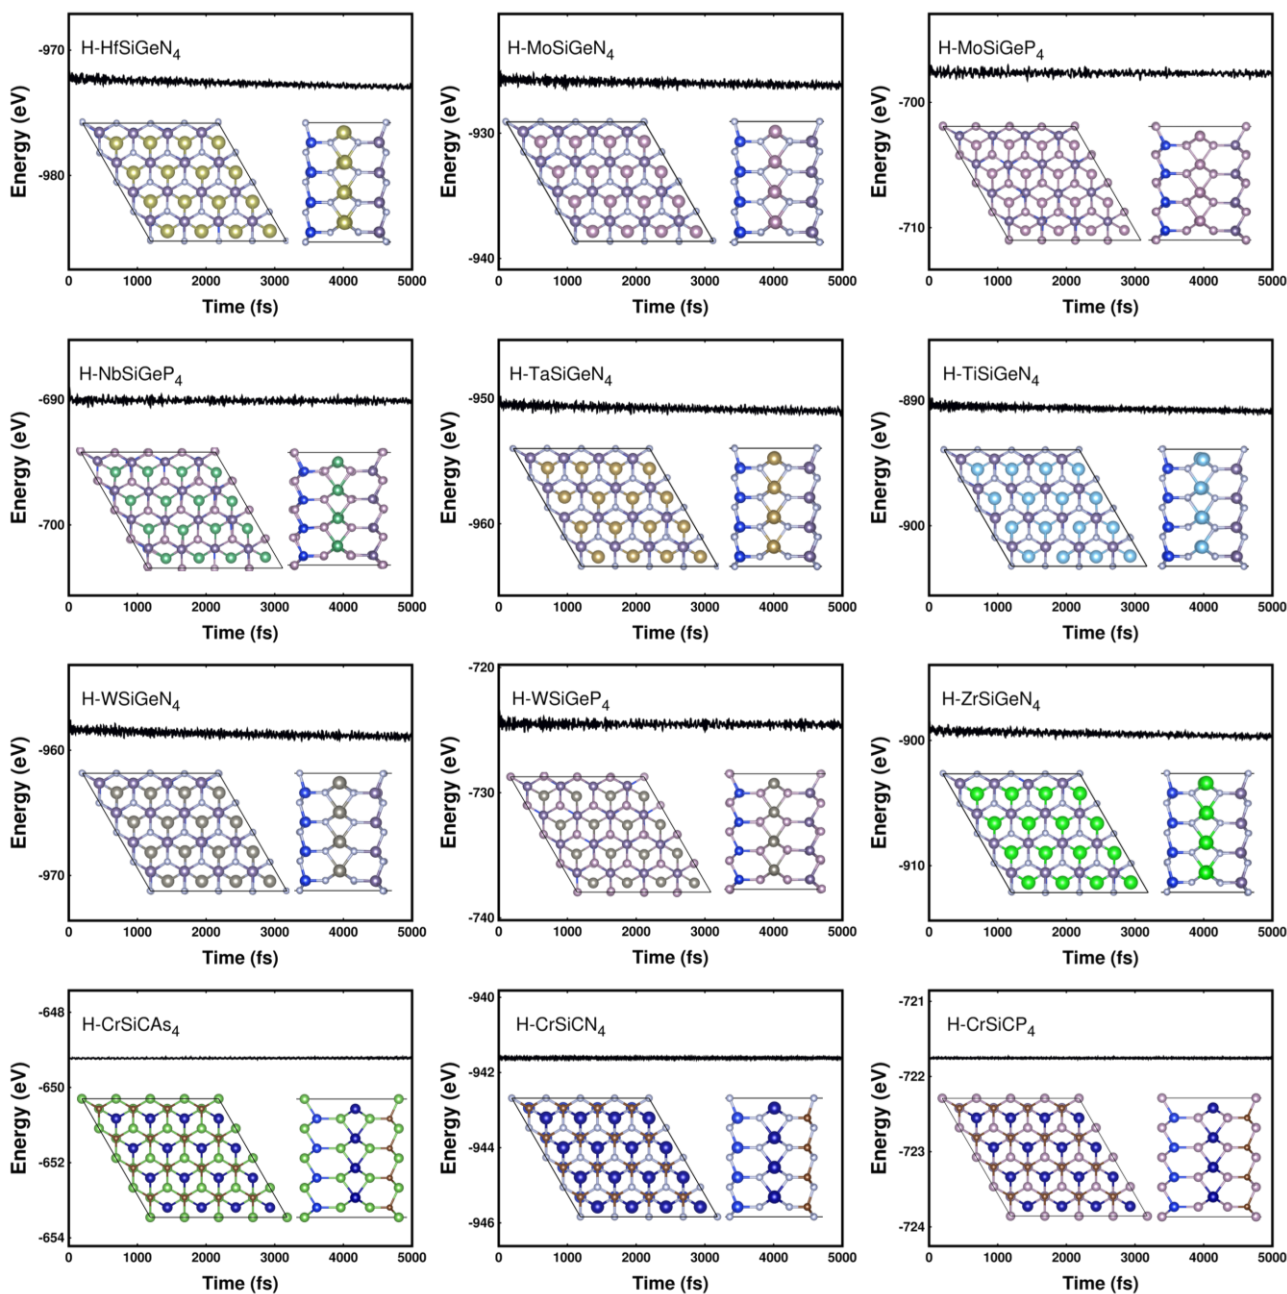



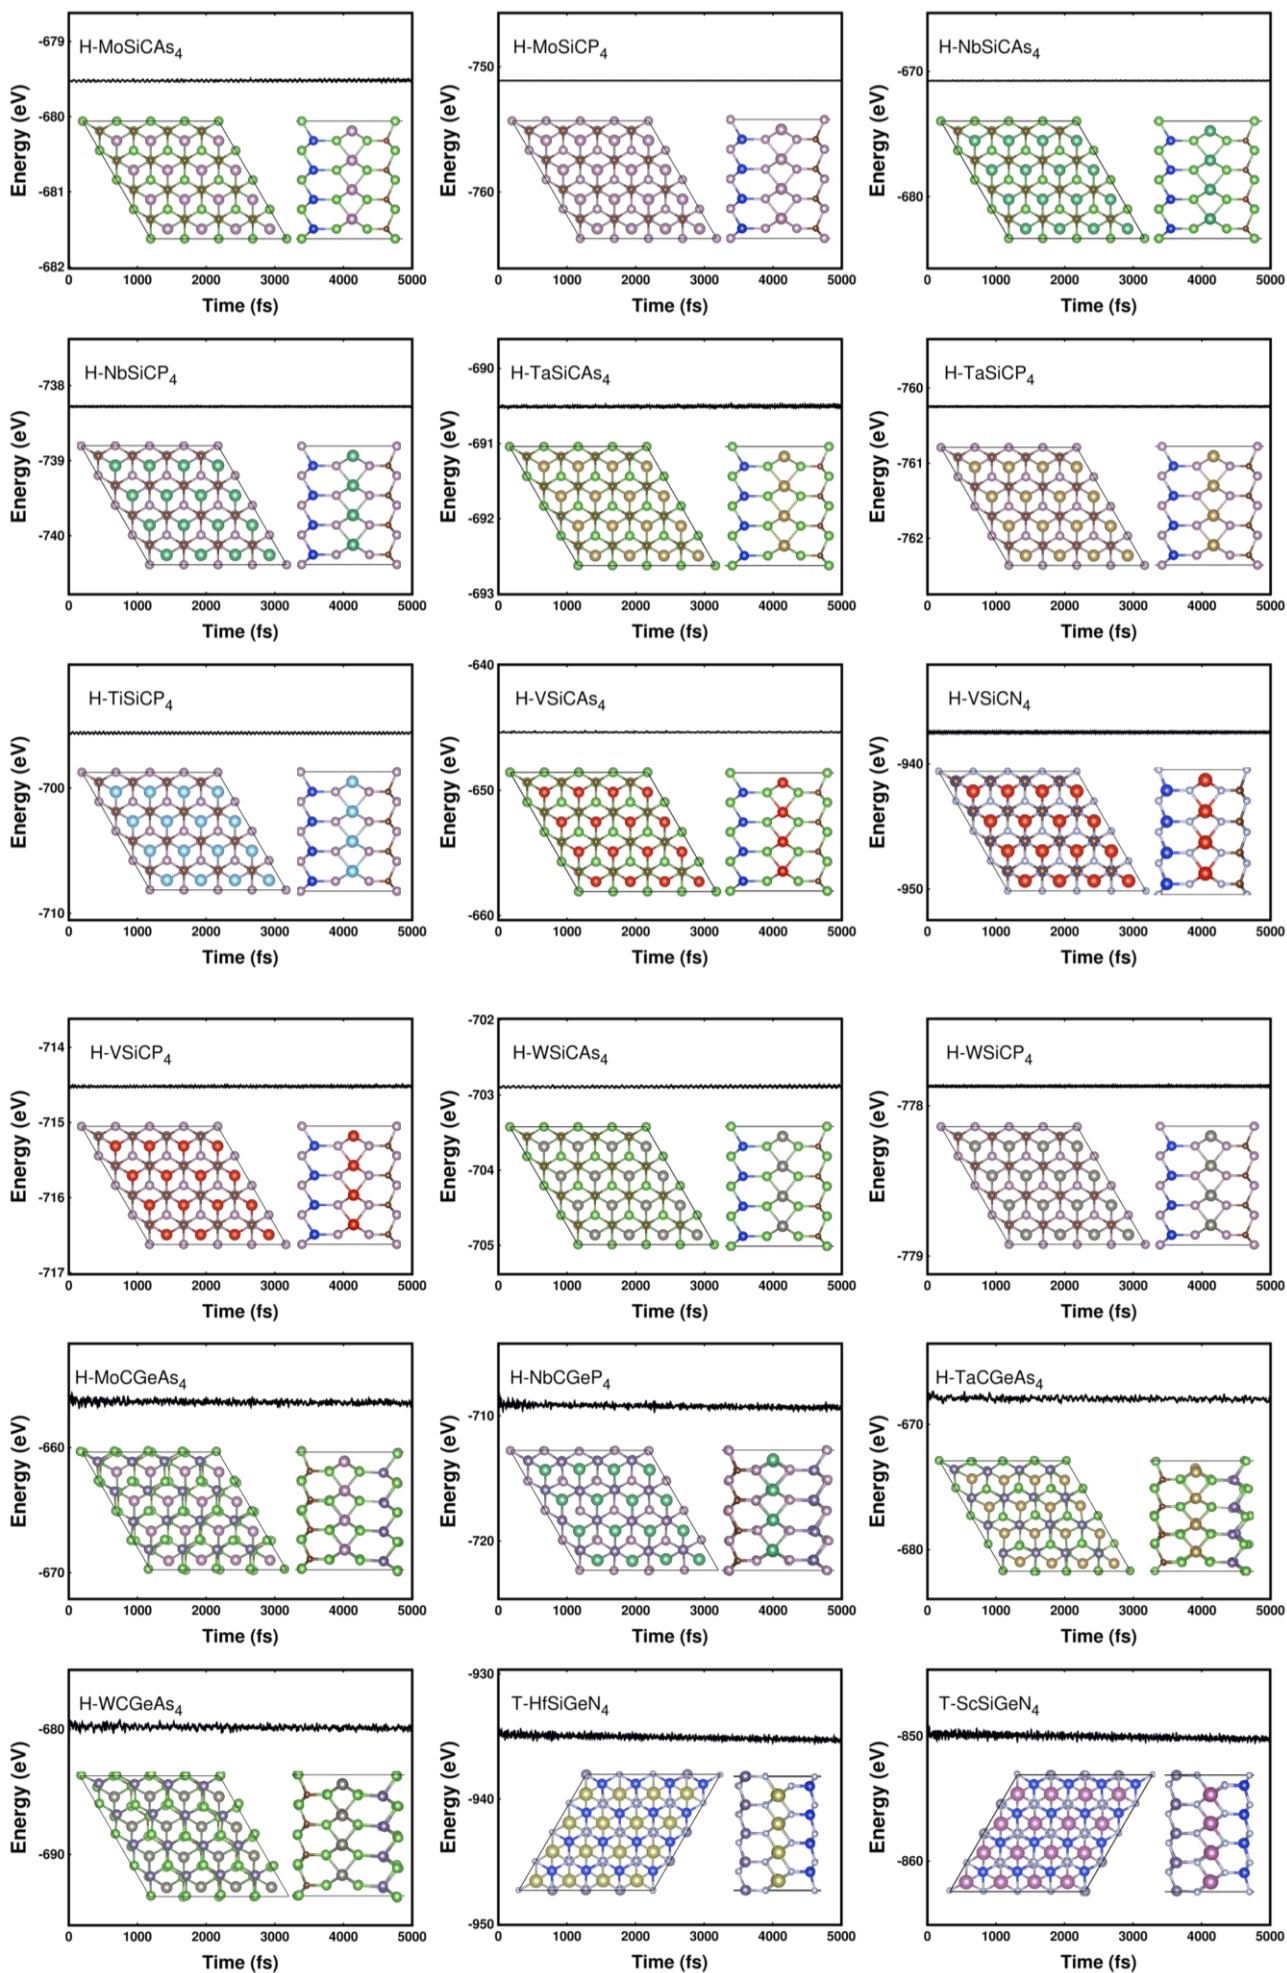



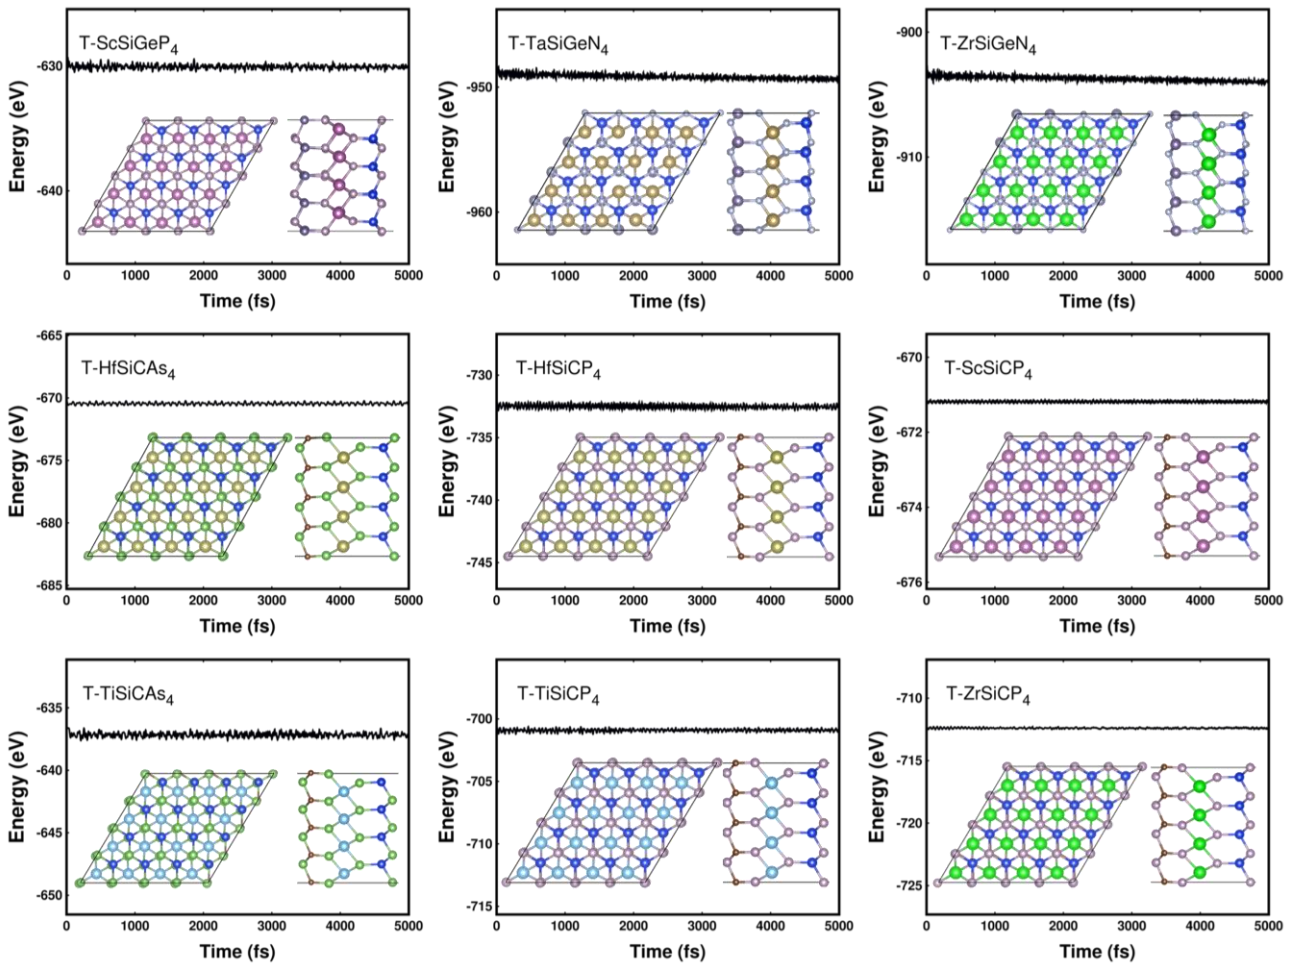

Fig. S4 The total potential energy and corresponding snapshots of the Janus  $MA_2Z_4$  after stabilization at 300 K for 5 ps were obtained in the AIMD simulations.

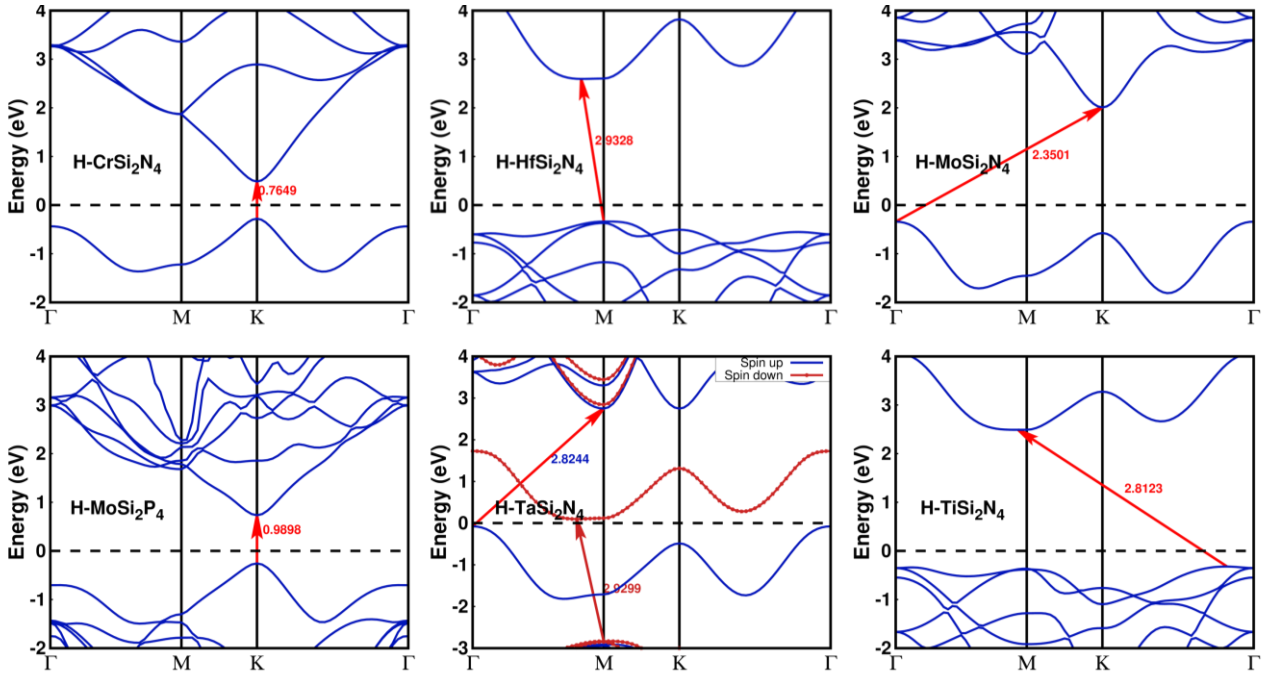

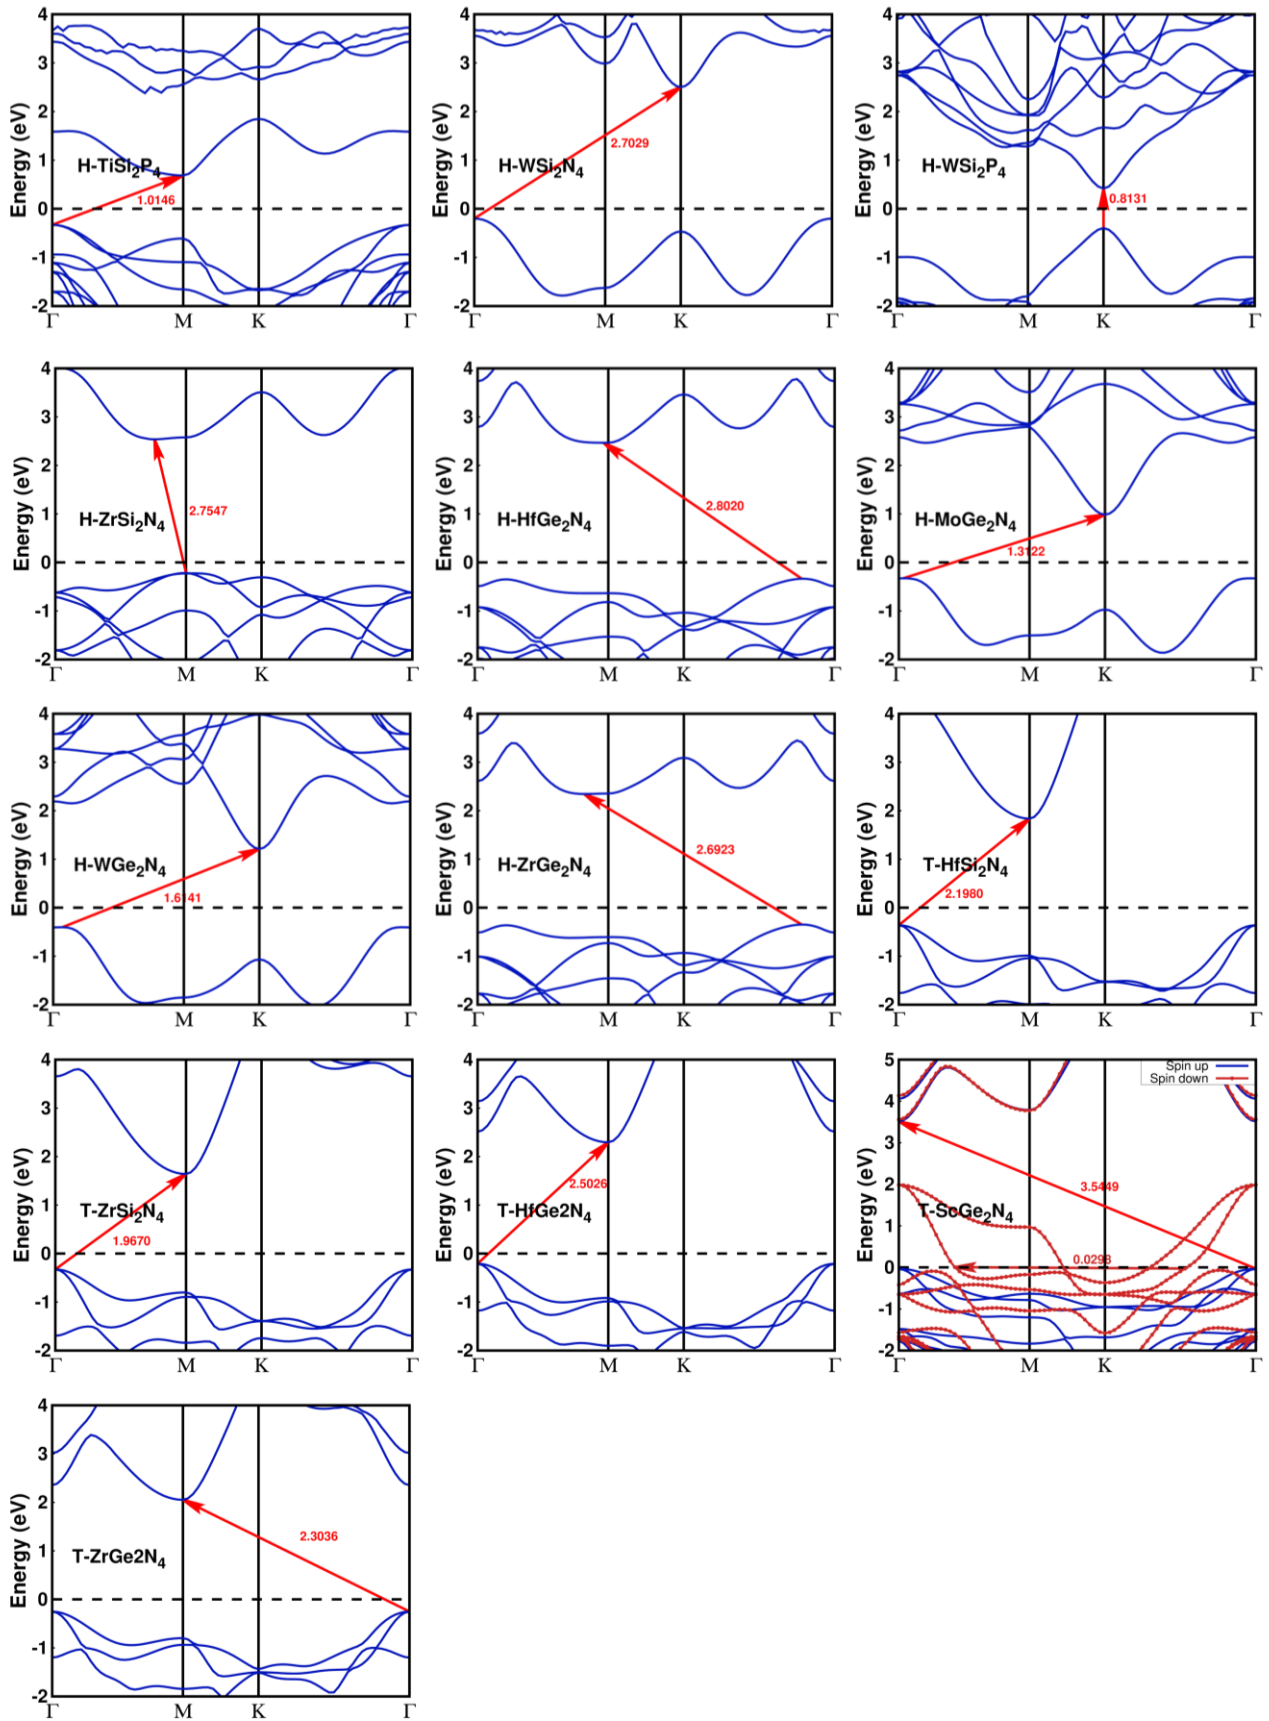

Fig. S5 Energy band structure diagrams of symmetric  $MA_2Z_4$  structures.

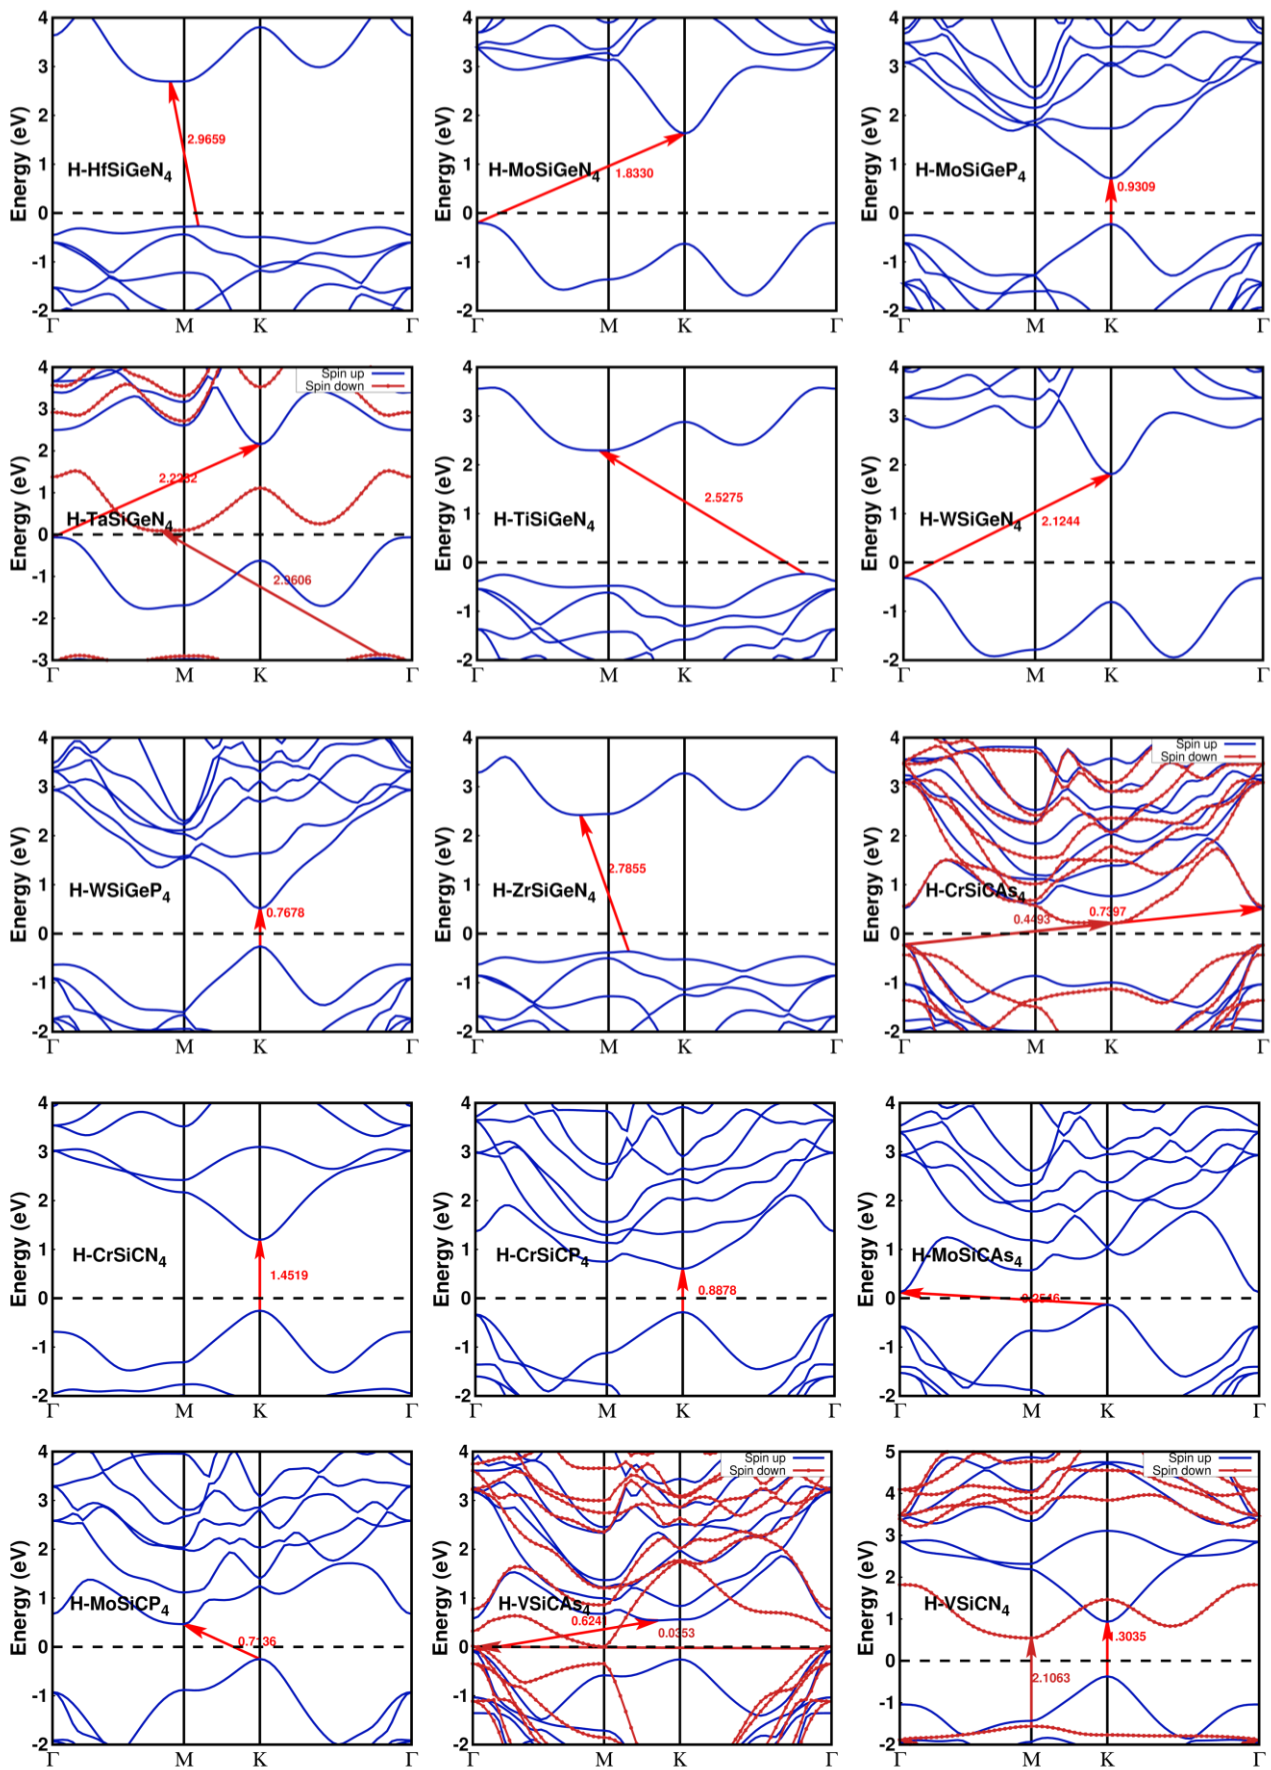

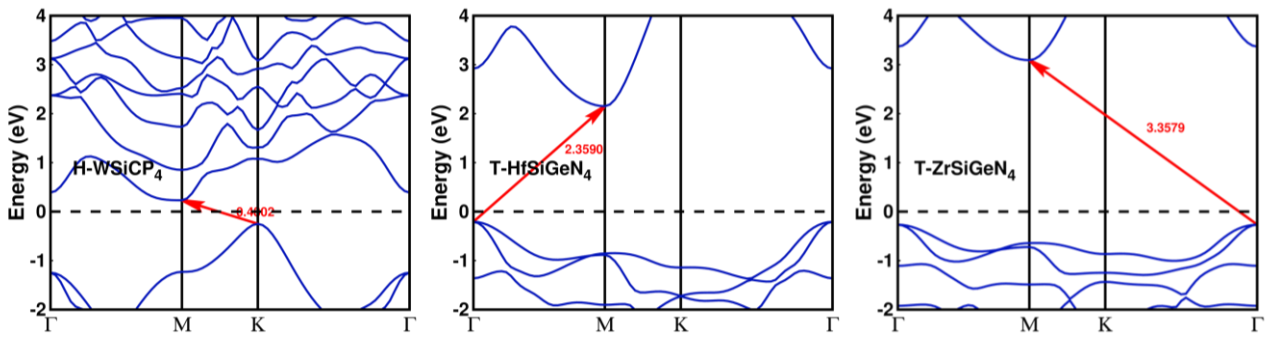

Fig. S6 Energy band structure diagrams of asymmetric Janus  $MA_2Z_4$  structures.

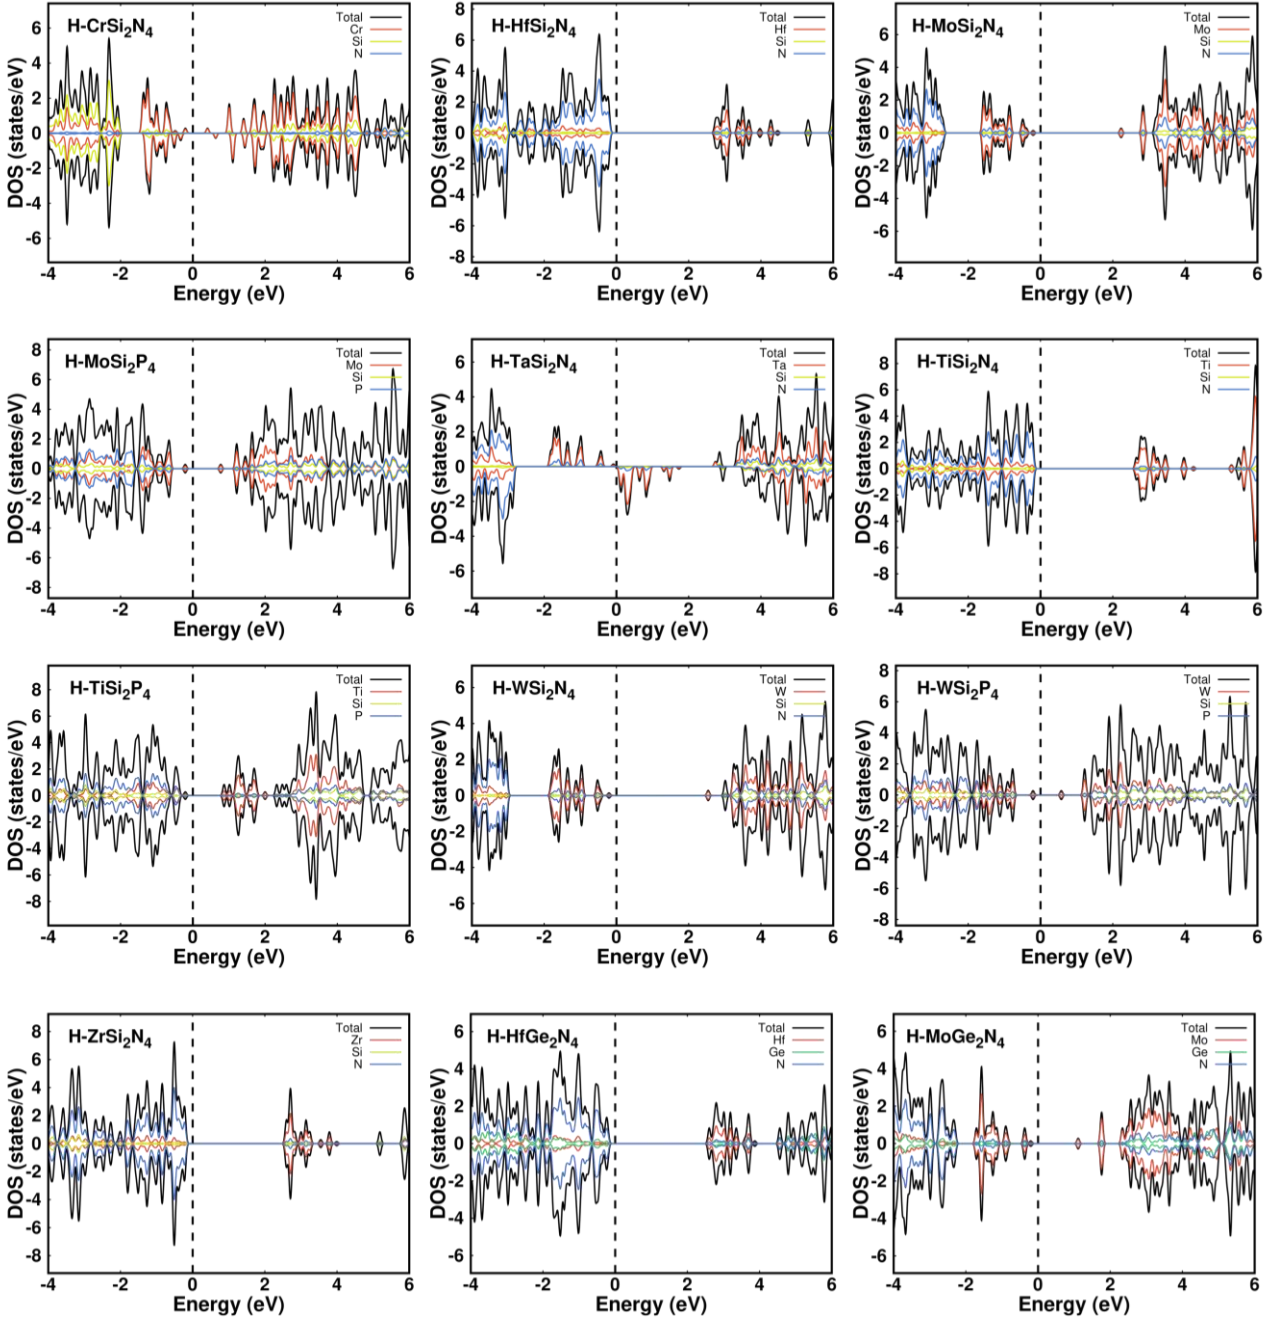



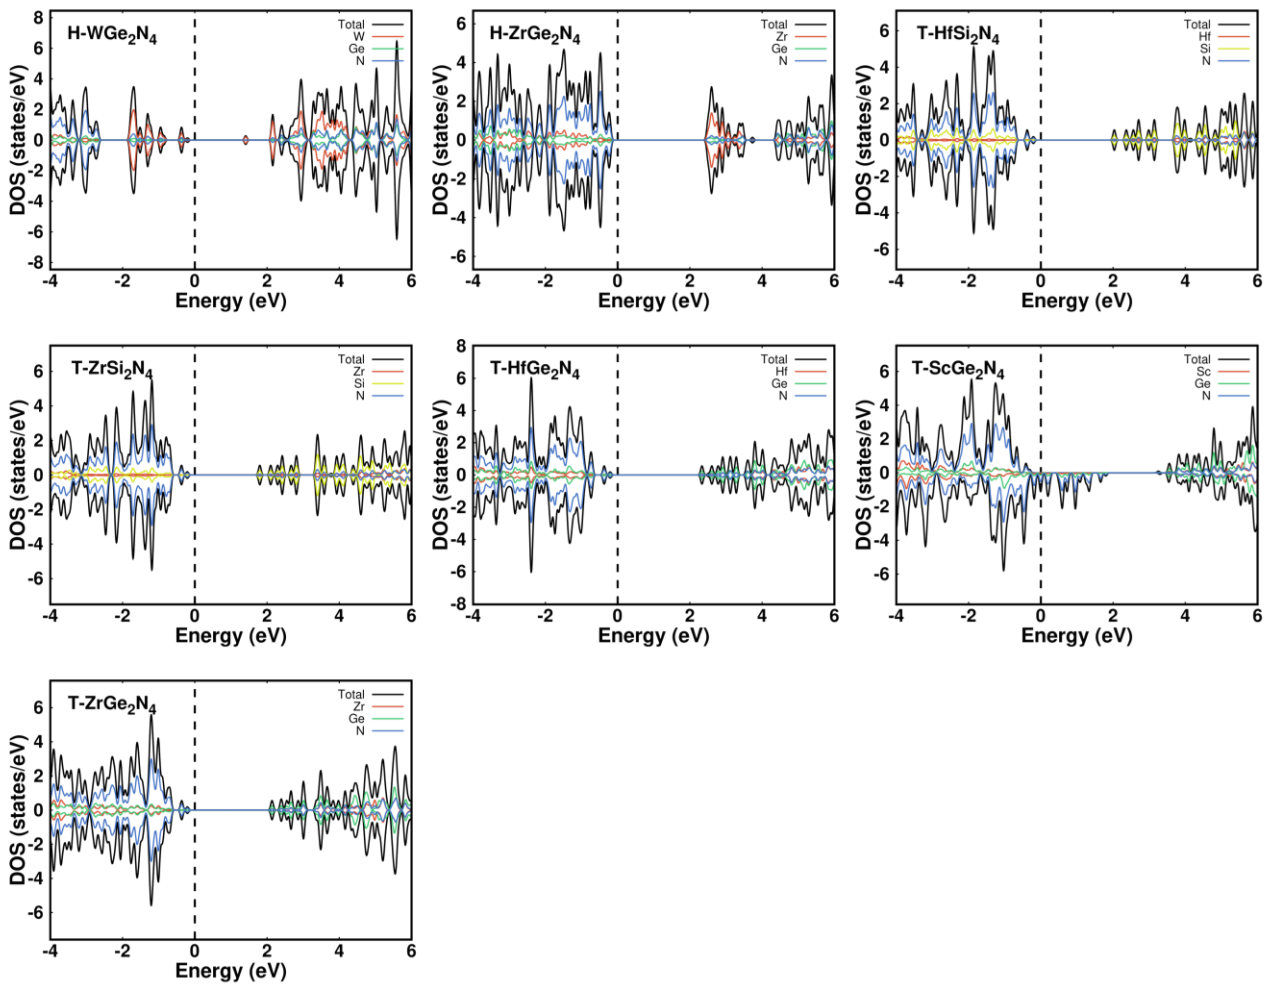

Fig. S7 TDOS and PDOS of symmetric  $MA_2Z_4$  structure.

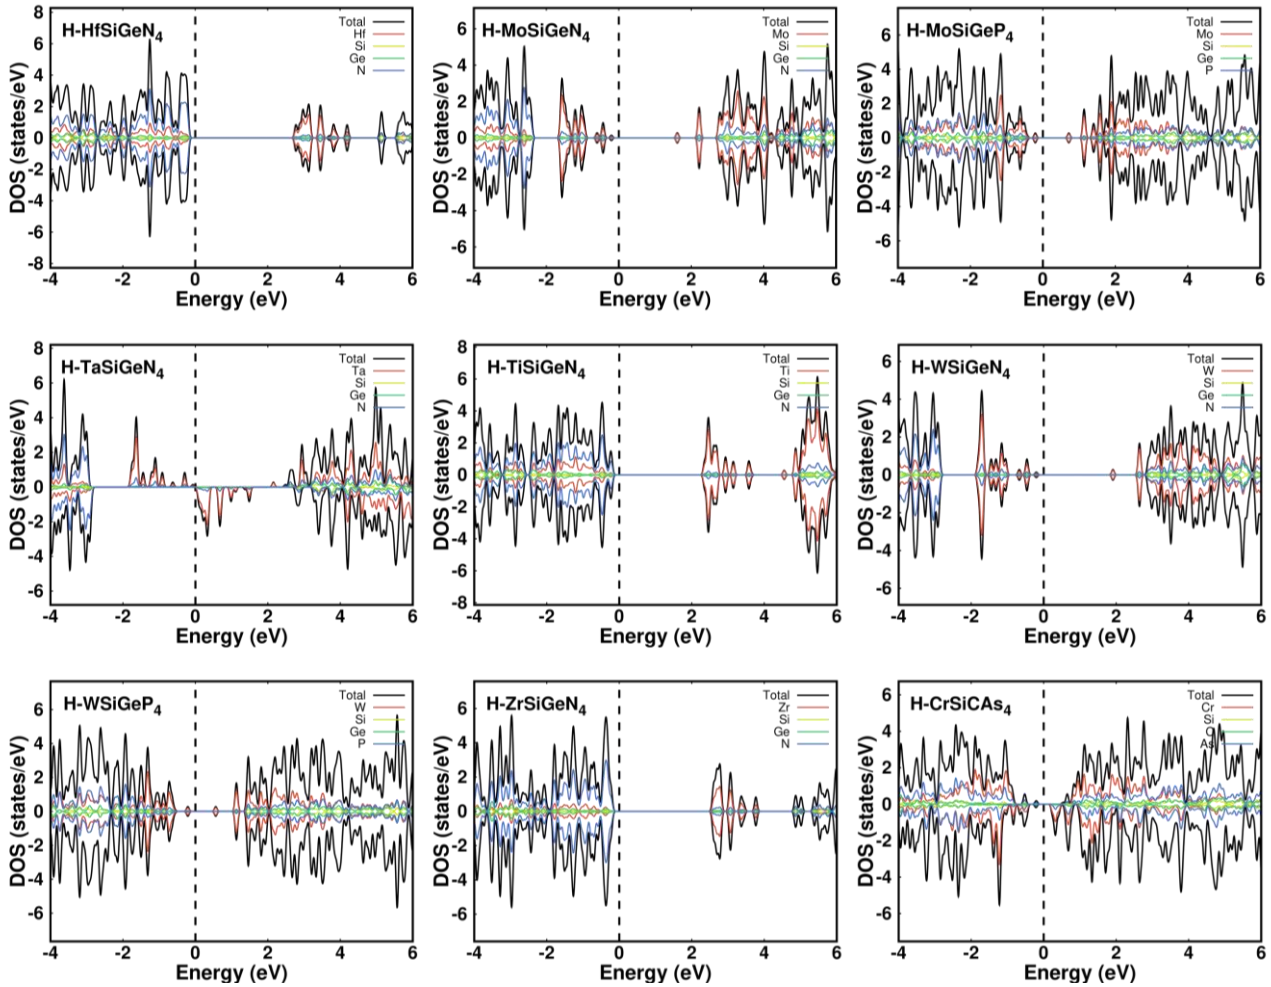

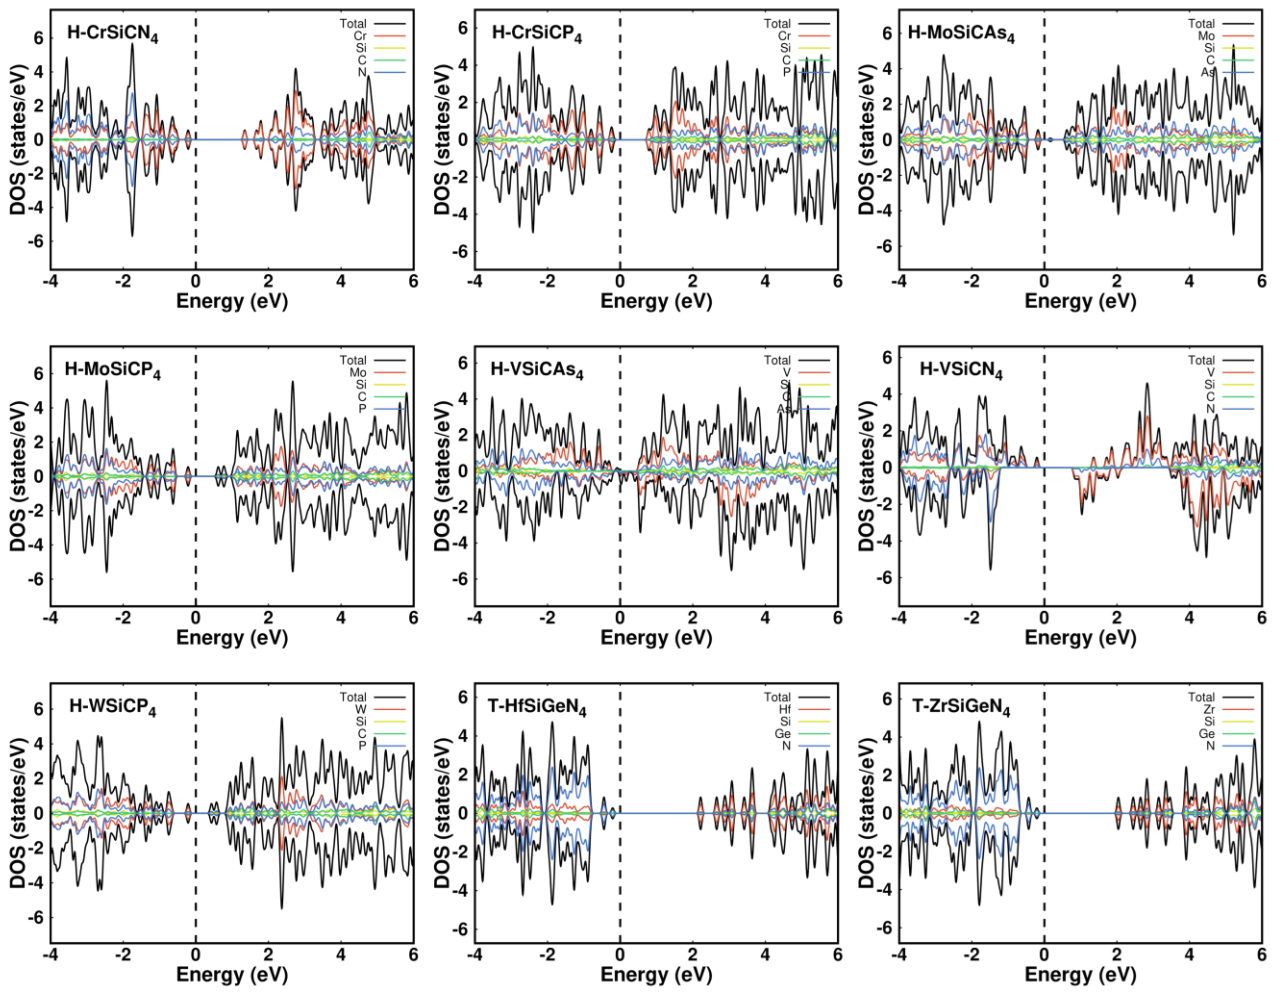

Fig. S8 TDOS and PDOS of asymmetric Janus  $MA_2Z_4$  structures.

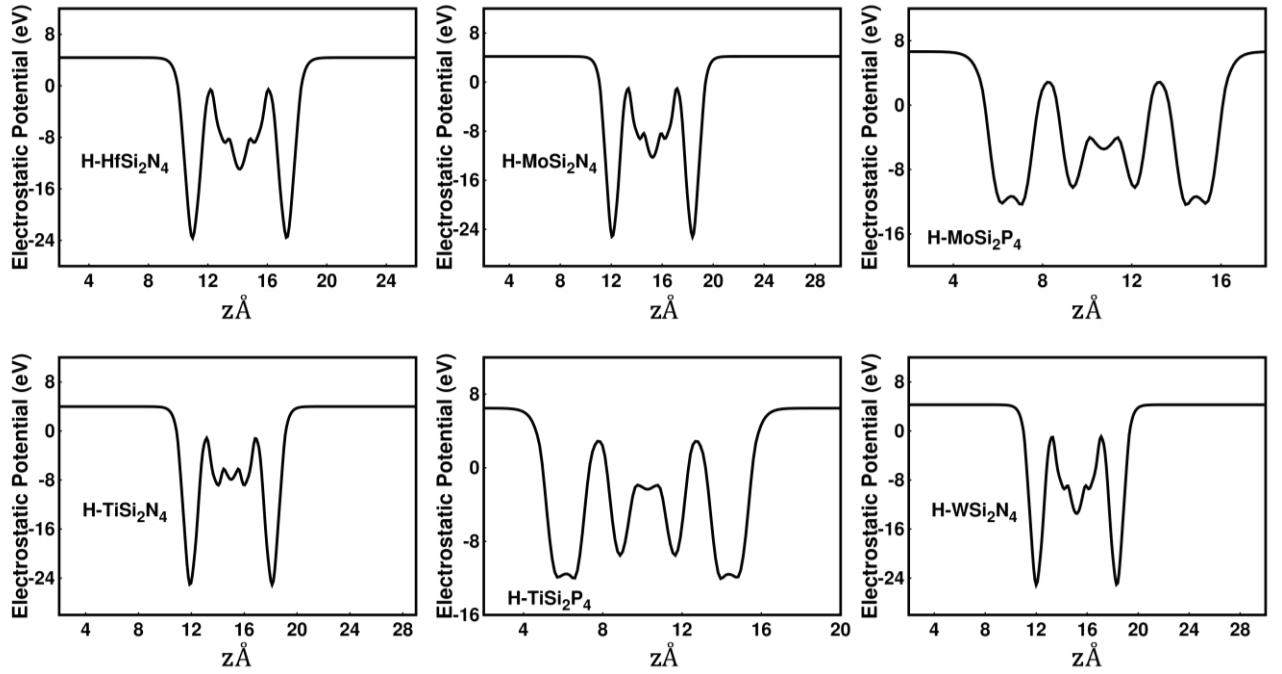



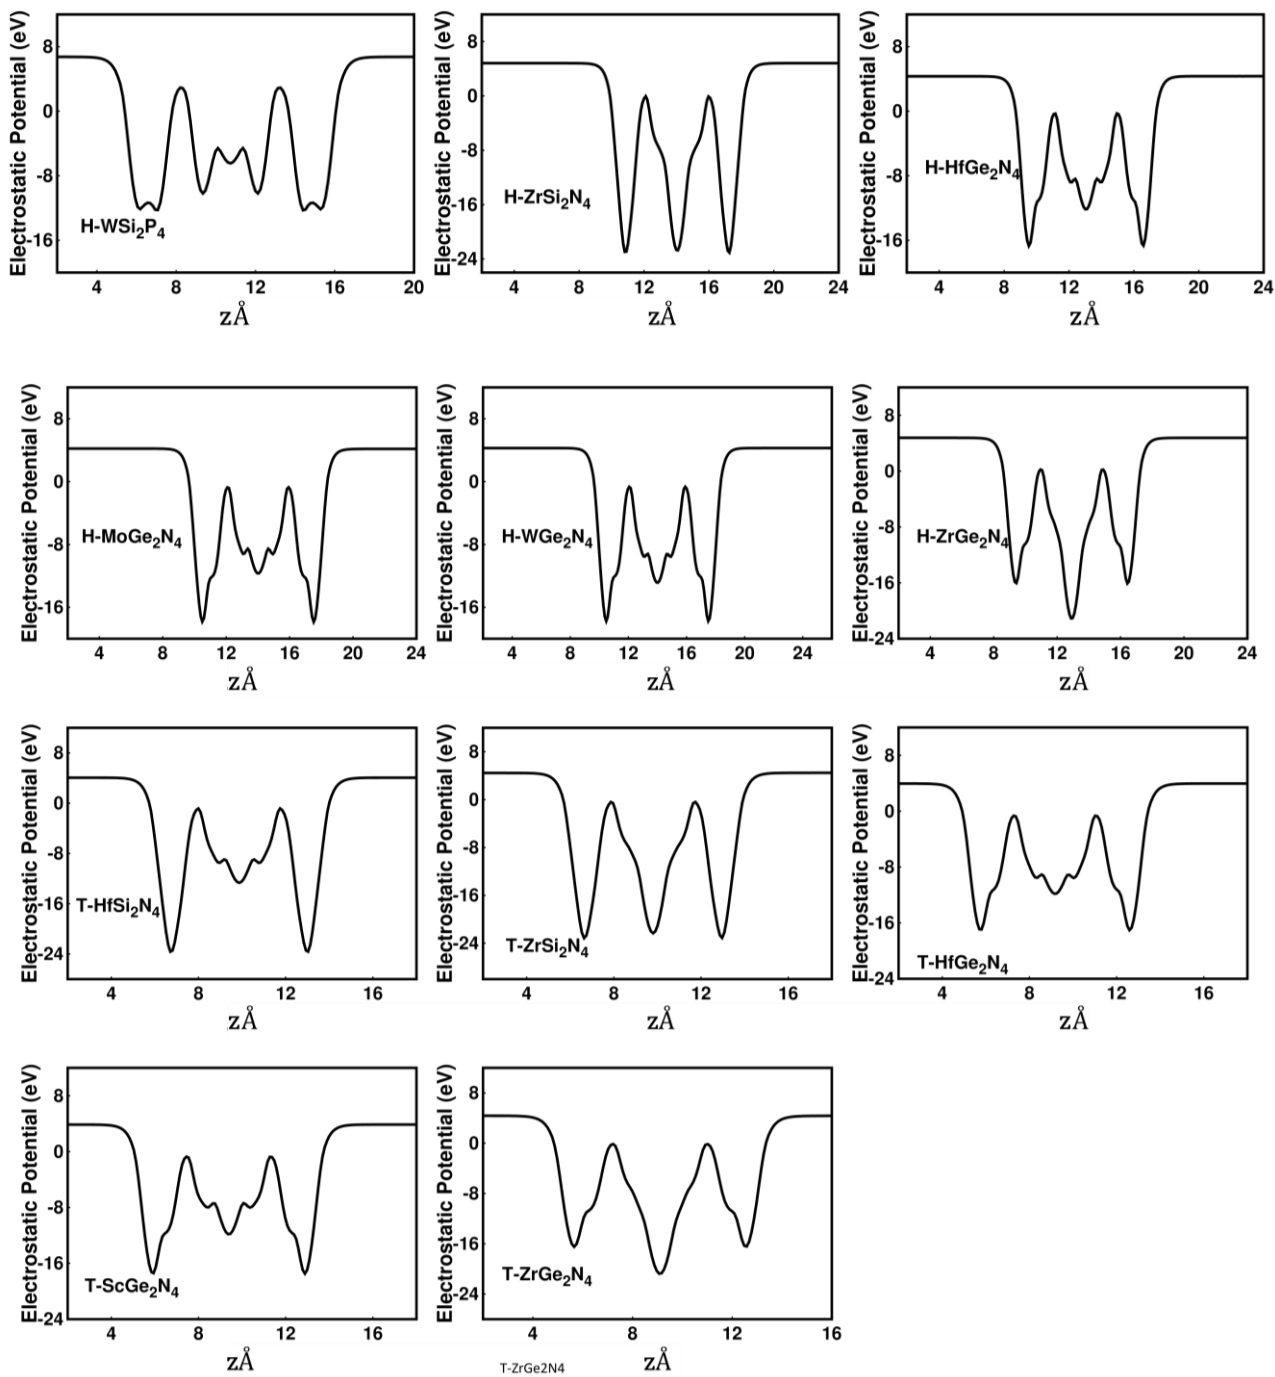

Fig. S9 Work function of symmetric structures.

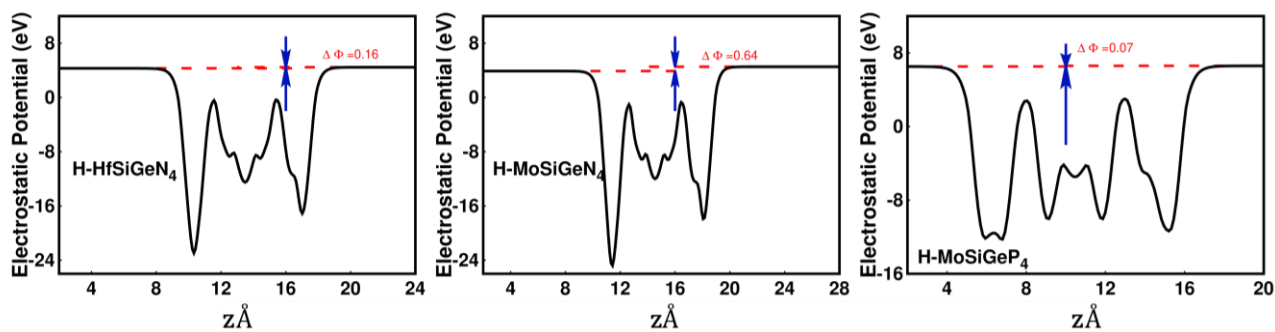

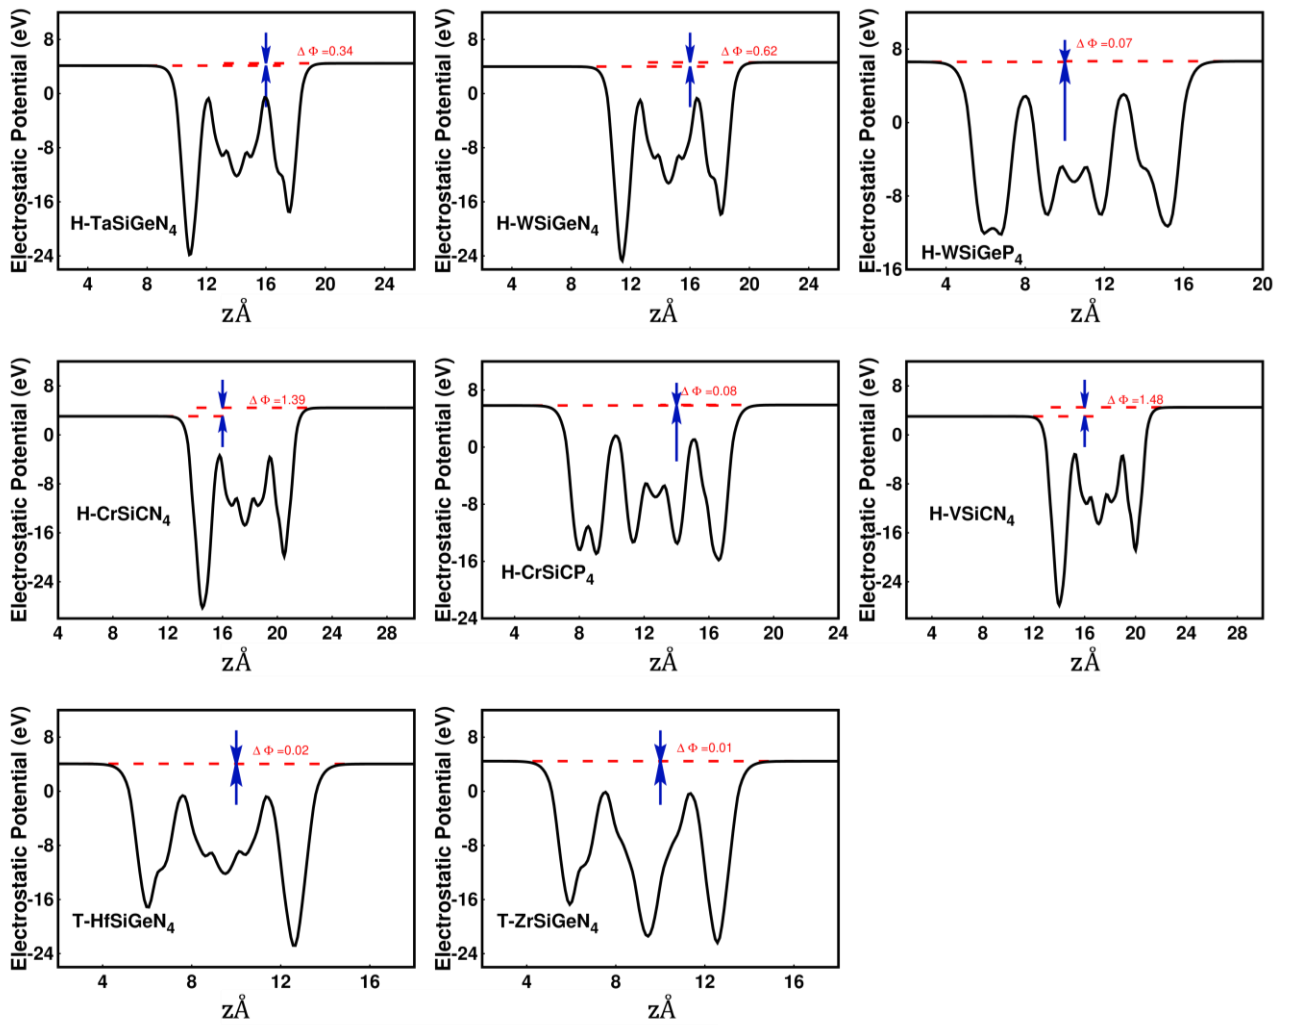

Fig. S10 work function of the Janus structures.

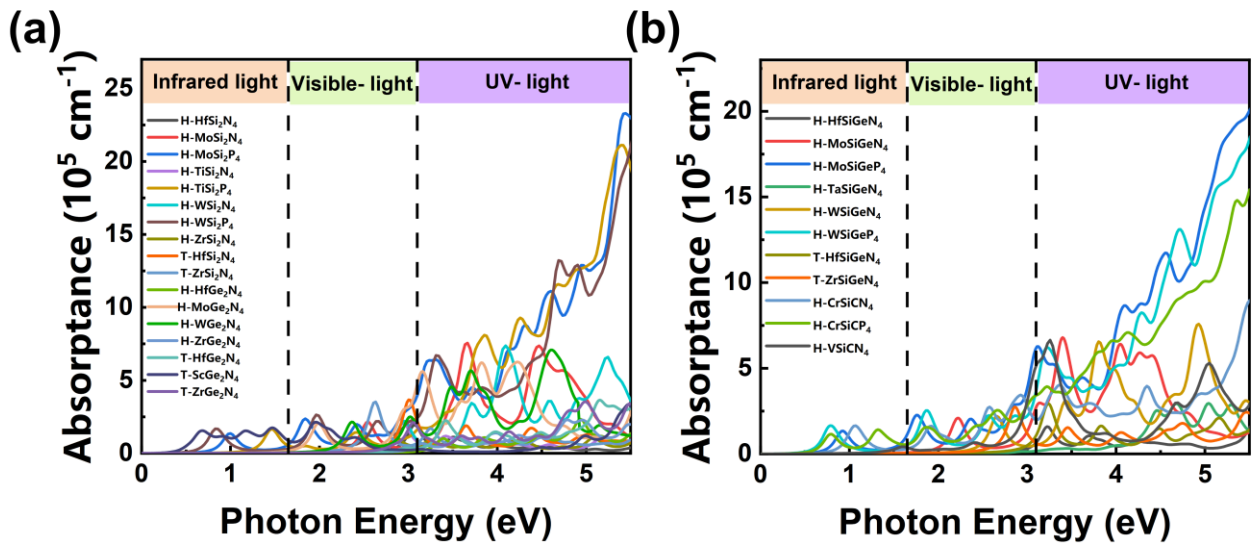

Fig. S11 Light absorption coefficients of Janus  $MA_2Z_4$  and symmetric  $MA_2Z_4$ .

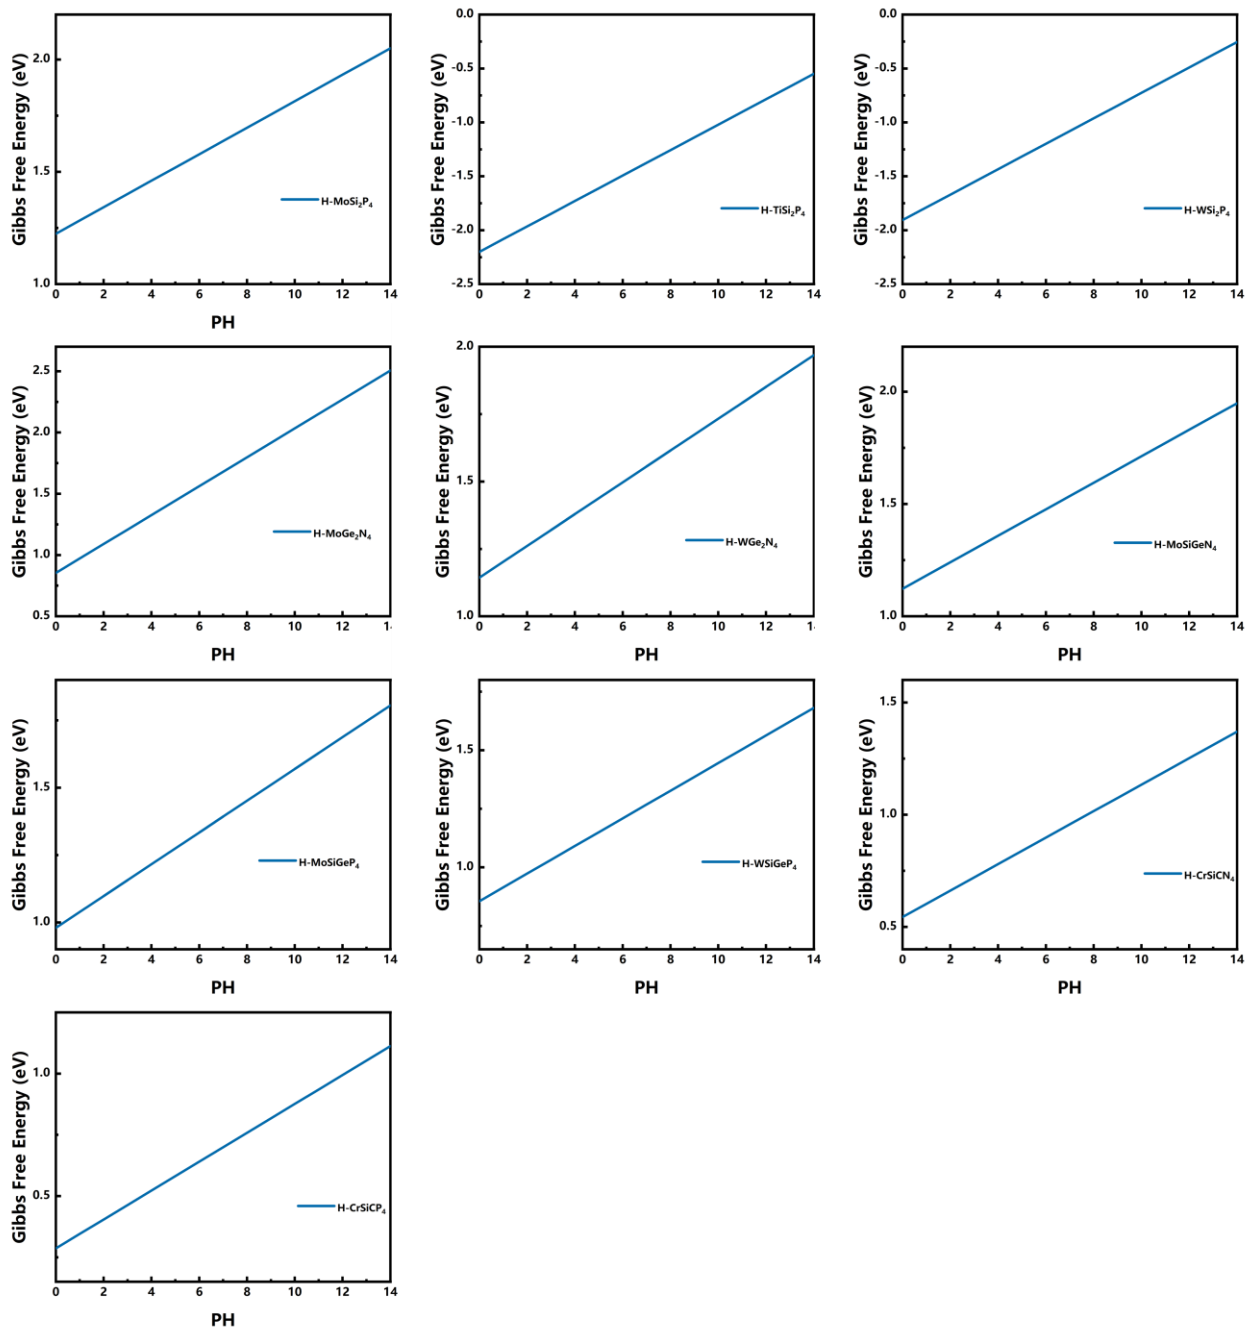

Fig. S12 HER adsorption energy at different PH.

## Supporting Tables

Table S1 Formation energy of H phase symmetric MA<sub>2</sub>Z<sub>4</sub> structures

| Structure                           | $E_f$ (eV) | Structure                           | $E_f$ (eV) | Structure                          | $E_f$ (eV) |
|-------------------------------------|------------|-------------------------------------|------------|------------------------------------|------------|
| H-CrSi <sub>2</sub> As <sub>4</sub> | -1.53621   | H-CrGe <sub>2</sub> As <sub>4</sub> | -1.63928   | H-CrC <sub>2</sub> As <sub>4</sub> | -1.56927   |
| H-CrSi <sub>2</sub> N <sub>4</sub>  | -4.55043   | H-CrGe <sub>2</sub> N <sub>4</sub>  | -3.73512   | H-CrC <sub>2</sub> N <sub>4</sub>  | -3.6433    |
| H-CrSi <sub>2</sub> P <sub>4</sub>  | -1.53206   | H-CrGe <sub>2</sub> P <sub>4</sub>  | -1.54771   | H-CrC <sub>2</sub> P <sub>4</sub>  | -1.86761   |
| H-CrSi <sub>2</sub> S <sub>4</sub>  | -2.1434    | H-CrGe <sub>2</sub> S <sub>4</sub>  | -2.17696   | H-CrC <sub>2</sub> S <sub>4</sub>  | -1.40492   |
| H-CrSi <sub>2</sub> Se <sub>4</sub> | -1.42037   | H-CrGe <sub>2</sub> Se <sub>4</sub> | -1.51632   | H-CrC <sub>2</sub> Se <sub>4</sub> | -0.65914   |
| H-CrSi <sub>2</sub> Te <sub>4</sub> | -1.07655   | H-CrGe <sub>2</sub> Te <sub>4</sub> | -1.20285   | H-CrC <sub>2</sub> Te <sub>4</sub> | -0.36513   |
| H-HfSi <sub>2</sub> As <sub>4</sub> | -1.7447    | H-HfGe <sub>2</sub> As <sub>4</sub> | -1.85079   | H-HfC <sub>2</sub> As <sub>4</sub> | -1.69599   |
| H-HfSi <sub>2</sub> N <sub>4</sub>  | -4.89378   | H-HfGe <sub>2</sub> N <sub>4</sub>  | -4.63656   | H-HfC <sub>2</sub> N <sub>4</sub>  | -3.29147   |
| H-HfSi <sub>2</sub> P <sub>4</sub>  | -1.5682    | H-HfGe <sub>2</sub> P <sub>4</sub>  | -2.00537   | H-HfC <sub>2</sub> P <sub>4</sub>  | -1.86402   |
| H-HfSi <sub>2</sub> S <sub>4</sub>  | -2.55749   | H-HfGe <sub>2</sub> S <sub>4</sub>  | -3.04349   | H-HfC <sub>2</sub> S <sub>4</sub>  | -1.64121   |
| H-HfSi <sub>2</sub> Se <sub>4</sub> | -1.85125   | H-HfGe <sub>2</sub> Se <sub>4</sub> | -2.37868   | H-HfC <sub>2</sub> Se <sub>4</sub> | -0.92946   |
| H-HfSi <sub>2</sub> Te <sub>4</sub> | -1.46648   | H-HfGe <sub>2</sub> Te <sub>4</sub> | -2.01203   | H-HfC <sub>2</sub> Te <sub>4</sub> | -0.657     |
| H-MoSi <sub>2</sub> As <sub>4</sub> | -1.52403   | H-MoGe <sub>2</sub> As <sub>4</sub> | -1.62908   | H-MoC <sub>2</sub> As <sub>4</sub> | -1.54983   |
| H-MoSi <sub>2</sub> N <sub>4</sub>  | -4.64147   | H-MoGe <sub>2</sub> N <sub>4</sub>  | -3.87599   | H-MoC <sub>2</sub> N <sub>4</sub>  | -3.4213    |
| H-MoSi <sub>2</sub> P <sub>4</sub>  | -2.13252   | H-MoGe <sub>2</sub> P <sub>4</sub>  | -1.46724   | H-MoC <sub>2</sub> P <sub>4</sub>  | -1.80966   |
| H-MoSi <sub>2</sub> S <sub>4</sub>  | -2.23908   | H-MoGe <sub>2</sub> S <sub>4</sub>  | -2.27387   | H-MoC <sub>2</sub> S <sub>4</sub>  | -1.39711   |
| H-MoSi <sub>2</sub> Se <sub>4</sub> | -1.5073    | H-MoGe <sub>2</sub> Se <sub>4</sub> | -1.59396   | H-MoC <sub>2</sub> Se <sub>4</sub> | -0.68717   |
| H-MoSi <sub>2</sub> Te <sub>4</sub> | -1.12603   | H-MoGe <sub>2</sub> Te <sub>4</sub> | -1.24886   | H-MoC <sub>2</sub> Te <sub>4</sub> | -0.40269   |
| H-ScSi <sub>2</sub> As <sub>4</sub> | -1.42546   | H-ScGe <sub>2</sub> As <sub>4</sub> | -1.52309   | H-ScC <sub>2</sub> As <sub>4</sub> | -1.39678   |
| H-ScSi <sub>2</sub> N <sub>4</sub>  | -4.28884   | H-ScGe <sub>2</sub> N <sub>4</sub>  | -3.616     | H-ScC <sub>2</sub> N <sub>4</sub>  | -2.94745   |
| H-ScSi <sub>2</sub> P <sub>4</sub>  | -1.25203   | H-ScGe <sub>2</sub> P <sub>4</sub>  | -1.26996   | H-ScC <sub>2</sub> P <sub>4</sub>  | -1.54435   |
| H-ScSi <sub>2</sub> S <sub>4</sub>  | -2.23919   | H-ScGe <sub>2</sub> S <sub>4</sub>  | -2.27827   | H-ScC <sub>2</sub> S <sub>4</sub>  | -1.34176   |
| H-ScSi <sub>2</sub> Se <sub>4</sub> | -1.62636   | H-ScGe <sub>2</sub> Se <sub>4</sub> | -0.908611  | H-ScC <sub>2</sub> Se <sub>4</sub> | -0.66479   |
| H-ScSi <sub>2</sub> Te <sub>4</sub> | -1.20581   | H-ScGe <sub>2</sub> Te <sub>4</sub> | -1.36069   | H-ScC <sub>2</sub> Te <sub>4</sub> | -0.34624   |
| H-TaSi <sub>2</sub> As <sub>4</sub> | -1.73217   | H-TaGe <sub>2</sub> As <sub>4</sub> | -1.82522   | H-TaC <sub>2</sub> As <sub>4</sub> | -1.69654   |
| H-TaSi <sub>2</sub> N <sub>4</sub>  | -4.89502   | H-TaGe <sub>2</sub> N <sub>4</sub>  | -4.1775    | H-TaC <sub>2</sub> N <sub>4</sub>  | -3.46986   |
| H-TaSi <sub>2</sub> P <sub>4</sub>  | -1.60968   | H-TaGe <sub>2</sub> P <sub>4</sub>  | -1.64091   | H-TaC <sub>2</sub> P <sub>4</sub>  | -1.92664   |
| H-TaSi <sub>2</sub> S <sub>4</sub>  | -2.48561   | H-TaGe <sub>2</sub> S <sub>4</sub>  | -2.54342   | H-TaC <sub>2</sub> S <sub>4</sub>  | -1.52162   |
| H-TaSi <sub>2</sub> Se <sub>4</sub> | -1.74104   | H-TaGe <sub>2</sub> Se <sub>4</sub> | -1.84757   | H-TaC <sub>2</sub> Se <sub>4</sub> | -0.8384    |
| H-TaSi <sub>2</sub> Te <sub>4</sub> | -1.3351    | H-TaGe <sub>2</sub> Te <sub>4</sub> | -1.48409   | H-TaC <sub>2</sub> Te <sub>4</sub> | -0.57411   |
| H-TiSi <sub>2</sub> As <sub>4</sub> | -1.61005   | H-TiGe <sub>2</sub> As <sub>4</sub> | -1.71538   | H-TiC <sub>2</sub> As <sub>4</sub> | -1.58024   |
| H-TiSi <sub>2</sub> N <sub>4</sub>  | -4.69403   | H-TiGe <sub>2</sub> N <sub>4</sub>  | -3.99473   | H-TiC <sub>2</sub> N <sub>4</sub>  | -3.43092   |
| H-TiSi <sub>2</sub> P <sub>4</sub>  | -2.11829   | H-TiGe <sub>2</sub> P <sub>4</sub>  | -1.5269    | H-TiC <sub>2</sub> P <sub>4</sub>  | -1.79553   |
| H-TiSi <sub>2</sub> S <sub>4</sub>  | -2.19883   | H-TiGe <sub>2</sub> S <sub>4</sub>  | -2.36603   | H-TiC <sub>2</sub> S <sub>4</sub>  | -1.46633   |
| H-TiSi <sub>2</sub> Se <sub>4</sub> | -1.58424   | H-TiGe <sub>2</sub> Se <sub>4</sub> | -1.69752   | H-TiC <sub>2</sub> Se <sub>4</sub> | -0.74335   |
| H-TiSi <sub>2</sub> Te <sub>4</sub> | -1.2341    | H-TiGe <sub>2</sub> Te <sub>4</sub> | -1.38386   | H-TiC <sub>2</sub> Te <sub>4</sub> | -0.48188   |
| H-VSi <sub>2</sub> As <sub>4</sub>  | -1.78022   | H-VGe <sub>2</sub> As <sub>4</sub>  | -1.8758    | H-VC <sub>2</sub> As <sub>4</sub>  | -1.78553   |
| H-VSi <sub>2</sub> N <sub>4</sub>   | -4.84383   | H-VGe <sub>2</sub> N <sub>4</sub>   | -4.07183   | H-VC <sub>2</sub> N <sub>4</sub>   | -3.77692   |
| H-VSi <sub>2</sub> P <sub>4</sub>   | -1.73466   | H-VGe <sub>2</sub> P <sub>4</sub>   | -1.73928   | H-VC <sub>2</sub> P <sub>4</sub>   | -2.05502   |
| H-VSi <sub>2</sub> S <sub>4</sub>   | -2.3912    | H-VGe <sub>2</sub> S <sub>4</sub>   | -2.44091   | H-VC <sub>2</sub> S <sub>4</sub>   | -1.52521   |
| H-VSi <sub>2</sub> Se <sub>4</sub>  | -1.67258   | H-VGe <sub>2</sub> Se <sub>4</sub>  | -1.77744   | H-VC <sub>2</sub> Se <sub>4</sub>  | -0.86367   |
| H-VSi <sub>2</sub> Te <sub>4</sub>  | -1.32609   | H-VGe <sub>2</sub> Te <sub>4</sub>  | -1.47082   | H-VC <sub>2</sub> Te <sub>4</sub>  | -0.61326   |

|                                     |          |                                     |          |                                    |          |
|-------------------------------------|----------|-------------------------------------|----------|------------------------------------|----------|
| H-WSi <sub>2</sub> As <sub>4</sub>  | -1.79064 | H-WGe <sub>2</sub> As <sub>4</sub>  | -1.89099 | H-WC <sub>2</sub> As <sub>4</sub>  | -1.7846  |
| H-WSi <sub>2</sub> N <sub>4</sub>   | -4.9912  | H-WGe <sub>2</sub> N <sub>4</sub>   | -4.19632 | H-WC <sub>2</sub> N <sub>4</sub>   | -3.70007 |
| H-WSi <sub>2</sub> P <sub>4</sub>   | -2.40938 | H-WGe <sub>2</sub> P <sub>4</sub>   | -1.74217 | H-WC <sub>2</sub> P <sub>4</sub>   | -2.06607 |
| H-WSi <sub>2</sub> S <sub>4</sub>   | -2.52713 | H-WGe <sub>2</sub> S <sub>4</sub>   | -2.54921 | H-WC <sub>2</sub> S <sub>4</sub>   | -1.66244 |
| H-WSi <sub>2</sub> Se <sub>4</sub>  | -1.776   | H-WGe <sub>2</sub> Se <sub>4</sub>  | -1.85316 | H-WC <sub>2</sub> Se <sub>4</sub>  | -0.94815 |
| H-WSi <sub>2</sub> Te <sub>4</sub>  | -1.35792 | H-WGe <sub>2</sub> Te <sub>4</sub>  | -1.47774 | H-WC <sub>2</sub> Te <sub>4</sub>  | -0.45626 |
| H-NbSi <sub>2</sub> As <sub>4</sub> | -1.44653 | H-NbGe <sub>2</sub> As <sub>4</sub> | -1.54459 | H-NbC <sub>2</sub> As <sub>4</sub> | -1.4537  |
| H-NbSi <sub>2</sub> N <sub>4</sub>  | -4.56341 | H-NbGe <sub>2</sub> N <sub>4</sub>  | -3.85025 | H-NbC <sub>2</sub> N <sub>4</sub>  | -3.18256 |
| H-NbSi <sub>2</sub> P <sub>4</sub>  | -1.32455 | H-NbGe <sub>2</sub> P <sub>4</sub>  | -1.35434 | H-NbC <sub>2</sub> P <sub>4</sub>  | -1.66902 |
| H-NbSi <sub>2</sub> S <sub>4</sub>  | -2.20329 | H-NbGe <sub>2</sub> S <sub>4</sub>  | -2.26193 | H-NbC <sub>2</sub> S <sub>4</sub>  | -1.27631 |
| H-NbSi <sub>2</sub> Se <sub>4</sub> | -1.47859 | H-NbGe <sub>2</sub> Se <sub>4</sub> | -1.58625 | H-NbC <sub>2</sub> Se <sub>4</sub> | -0.58924 |
| H-NbSi <sub>2</sub> Te <sub>4</sub> | -1.10014 | H-NbGe <sub>2</sub> Te <sub>4</sub> | -1.25018 | H-NbC <sub>2</sub> Te <sub>4</sub> | -0.34493 |
| H-ZrSi <sub>2</sub> As <sub>4</sub> | -1.59347 | H-ZrGe <sub>2</sub> As <sub>4</sub> | -1.69801 | H-ZrC <sub>2</sub> As <sub>4</sub> | -1.57142 |
| H-ZrSi <sub>2</sub> N <sub>4</sub>  | -4.66275 | H-ZrGe <sub>2</sub> N <sub>4</sub>  | -4.03093 | H-ZrC <sub>2</sub> N <sub>4</sub>  | -3.05984 |
| H-ZrSi <sub>2</sub> P <sub>4</sub>  | -1.40312 | H-ZrGe <sub>2</sub> P <sub>4</sub>  | -1.44849 | H-ZrC <sub>2</sub> P <sub>4</sub>  | -1.71953 |
| H-ZrSi <sub>2</sub> S <sub>4</sub>  | -2.38198 | H-ZrGe <sub>2</sub> S <sub>4</sub>  | -2.48195 | H-ZrC <sub>2</sub> S <sub>4</sub>  | -1.50525 |
| H-ZrSi <sub>2</sub> Se <sub>4</sub> | -1.69436 | H-ZrGe <sub>2</sub> Se <sub>4</sub> | -1.83438 | H-ZrC <sub>2</sub> Se <sub>4</sub> | -0.80868 |
| H-ZrSi <sub>2</sub> Te <sub>4</sub> | -1.14951 | H-ZrGe <sub>2</sub> Te <sub>4</sub> | -1.48824 | H-ZrC <sub>2</sub> Te <sub>4</sub> | -0.54328 |

Table S2 Formation energy of T phase symmetric MA<sub>2</sub>Z<sub>4</sub> structures

| Structure                           | $E_f$ (eV) | Structure                           | $E_f$ (eV) | Structure                          | $E_f$ (eV) |
|-------------------------------------|------------|-------------------------------------|------------|------------------------------------|------------|
| T-CrSi <sub>2</sub> As <sub>4</sub> | -1.5511    | T-CrGe <sub>2</sub> As <sub>4</sub> | -1.6508    | T-CrC <sub>2</sub> As <sub>4</sub> | -1.537     |
| T-CrSi <sub>2</sub> N <sub>4</sub>  | -4.49288   | T-CrGe <sub>2</sub> N <sub>4</sub>  | -3.78382   | T-CrC <sub>2</sub> N <sub>4</sub>  | -3.468     |
| T-CrSi <sub>2</sub> P <sub>4</sub>  | -1.98958   | T-CrGe <sub>2</sub> P <sub>4</sub>  | -1.5433    | T-CrC <sub>2</sub> P <sub>4</sub>  | -1.82064   |
| T-CrSi <sub>2</sub> S <sub>4</sub>  | -2.12426   | T-CrGe <sub>2</sub> S <sub>4</sub>  | -2.12045   | T-CrC <sub>2</sub> S <sub>4</sub>  | -1.46269   |
| T-CrSi <sub>2</sub> Se <sub>4</sub> | -1.34752   | T-CrGe <sub>2</sub> Se <sub>4</sub> | -1.14884   | T-CrC <sub>2</sub> Se <sub>4</sub> | -0.61724   |
| T-CrSi <sub>2</sub> Te <sub>4</sub> | -0.70589   | T-CrGe <sub>2</sub> Te <sub>4</sub> | -0.94443   | T-CrC <sub>2</sub> Te <sub>4</sub> | -0.33027   |
| T-HfSi <sub>2</sub> As <sub>4</sub> | -1.74432   | T-HfGe <sub>2</sub> As <sub>4</sub> | -1.85592   | T-HfC <sub>2</sub> As <sub>4</sub> | -1.70519   |
| T-HfSi <sub>2</sub> N <sub>4</sub>  | -4.93828   | T-HfGe <sub>2</sub> N <sub>4</sub>  | -4.35005   | T-HfC <sub>2</sub> N <sub>4</sub>  | -3.30124   |
| T-HfSi <sub>2</sub> P <sub>4</sub>  | -1.19925   | T-HfGe <sub>2</sub> P <sub>4</sub>  | -0.3817    | T-HfC <sub>2</sub> P <sub>4</sub>  | -1.87501   |
| T-HfSi <sub>2</sub> S <sub>4</sub>  | -2.59429   | T-HfGe <sub>2</sub> S <sub>4</sub>  | -2.67479   | T-HfC <sub>2</sub> S <sub>4</sub>  | -1.78399   |
| T-HfSi <sub>2</sub> Se <sub>4</sub> | -1.87271   | T-HfGe <sub>2</sub> Se <sub>4</sub> | -1.84263   | T-HfC <sub>2</sub> Se <sub>4</sub> | -0.91709   |
| T-HfSi <sub>2</sub> Te <sub>4</sub> | -1.24485   | T-HfGe <sub>2</sub> Te <sub>4</sub> | -1.20623   | T-HfC <sub>2</sub> Te <sub>4</sub> | -0.65717   |
| T-MoSi <sub>2</sub> As <sub>4</sub> | -1.52782   | T-MoGe <sub>2</sub> As <sub>4</sub> | -1.64113   | T-MoC <sub>2</sub> As <sub>4</sub> | -1.5132    |
| T-MoSi <sub>2</sub> N <sub>4</sub>  | -4.50542   | T-MoGe <sub>2</sub> N <sub>4</sub>  | -3.79711   | T-MoC <sub>2</sub> N <sub>4</sub>  | -3.28271   |
| T-MoSi <sub>2</sub> P <sub>4</sub>  | -2.04001   | T-MoGe <sub>2</sub> P <sub>4</sub>  | -1.47312   | T-MoC <sub>2</sub> P <sub>4</sub>  | -1.7565    |
| T-MoSi <sub>2</sub> S <sub>4</sub>  | -2.12877   | T-MoGe <sub>2</sub> S <sub>4</sub>  | -2.16953   | T-MoC <sub>2</sub> S <sub>4</sub>  | -1.37282   |
| T-MoSi <sub>2</sub> Se <sub>4</sub> | -1.36358   | T-MoGe <sub>2</sub> Se <sub>4</sub> | -1.49855   | T-MoC <sub>2</sub> Se <sub>4</sub> | -0.60782   |
| T-MoSi <sub>2</sub> Te <sub>4</sub> | -0.87196   | T-MoGe <sub>2</sub> Te <sub>4</sub> | -0.95342   | T-MoC <sub>2</sub> Te <sub>4</sub> | -0.36418   |
| T-ScSi <sub>2</sub> As <sub>4</sub> | -1.43117   | T-ScGe <sub>2</sub> As <sub>4</sub> | -1.54375   | T-ScC <sub>2</sub> As <sub>4</sub> | -1.40608   |
| T-ScSi <sub>2</sub> N <sub>4</sub>  | -4.36035   | T-ScGe <sub>2</sub> N <sub>4</sub>  | -3.75179   | T-ScC <sub>2</sub> N <sub>4</sub>  | -2.95526   |
| T-ScSi <sub>2</sub> P <sub>4</sub>  | -1.97251   | T-ScGe <sub>2</sub> P <sub>4</sub>  | -1.27643   | T-ScC <sub>2</sub> P <sub>4</sub>  | -1.55778   |
| T-ScSi <sub>2</sub> S <sub>4</sub>  | -2.30833   | T-ScGe <sub>2</sub> S <sub>4</sub>  | -2.27294   | T-ScC <sub>2</sub> S <sub>4</sub>  | -1.40089   |
| T-ScSi <sub>2</sub> Se <sub>4</sub> | -1.54098   | T-ScGe <sub>2</sub> Se <sub>4</sub> | -1.53522   | T-ScC <sub>2</sub> Se <sub>4</sub> | -0.72684   |
| T-ScSi <sub>2</sub> Te <sub>4</sub> | -0.94383   | T-ScGe <sub>2</sub> Te <sub>4</sub> | -0.90861   | T-ScC <sub>2</sub> Te <sub>4</sub> | -0.34375   |

|                                     |          |                                     |          |                                    |          |
|-------------------------------------|----------|-------------------------------------|----------|------------------------------------|----------|
| T-TaSi <sub>2</sub> As <sub>4</sub> | -1.72198 | T-TaGe <sub>2</sub> As <sub>4</sub> | -1.89299 | T-TaC <sub>2</sub> As <sub>4</sub> | -1.69568 |
| T-TaSi <sub>2</sub> N <sub>4</sub>  | -4.85765 | T-TaGe <sub>2</sub> N <sub>4</sub>  | -4.20077 | T-TaC <sub>2</sub> N <sub>4</sub>  | -3.42461 |
| T-TaSi <sub>2</sub> P <sub>4</sub>  | -2.28187 | T-TaGe <sub>2</sub> P <sub>4</sub>  | -2.13653 | T-TaC <sub>2</sub> P <sub>4</sub>  | -1.91821 |
| T-TaSi <sub>2</sub> S <sub>4</sub>  | -2.46455 | T-TaGe <sub>2</sub> S <sub>4</sub>  | -0.5596  | T-TaC <sub>2</sub> S <sub>4</sub>  | -1.64813 |
| T-TaSi <sub>2</sub> Se <sub>4</sub> | -1.6546  | T-TaGe <sub>2</sub> Se <sub>4</sub> | -1.79115 | T-TaC <sub>2</sub> Se <sub>4</sub> | -0.83719 |
| T-TaSi <sub>2</sub> Te <sub>4</sub> | -1.19429 | T-TaGe <sub>2</sub> Te <sub>4</sub> | -1.0918  | T-TaC <sub>2</sub> Te <sub>4</sub> | -0.57685 |
| T-TiSi <sub>2</sub> As <sub>4</sub> | -1.81111 | T-TiGe <sub>2</sub> As <sub>4</sub> | -1.72396 | T-TiC <sub>2</sub> As <sub>4</sub> | -1.61246 |
| T-TiSi <sub>2</sub> N <sub>4</sub>  | -4.79721 | T-TiGe <sub>2</sub> N <sub>4</sub>  | -4.12206 | T-TiC <sub>2</sub> N <sub>4</sub>  | -3.42972 |
| T-TiSi <sub>2</sub> P <sub>4</sub>  | -1.69661 | T-TiGe <sub>2</sub> P <sub>4</sub>  | -1.53292 | T-TiC <sub>2</sub> P <sub>4</sub>  | -1.83015 |
| T-TiSi <sub>2</sub> S <sub>4</sub>  | -2.36102 | T-TiGe <sub>2</sub> S <sub>4</sub>  | -2.48353 | T-TiC <sub>2</sub> S <sub>4</sub>  | -1.62283 |
| T-TiSi <sub>2</sub> Se <sub>4</sub> | -1.57864 | T-TiGe <sub>2</sub> Se <sub>4</sub> | -1.75388 | T-TiC <sub>2</sub> Se <sub>4</sub> | -0.75634 |
| T-TiSi <sub>2</sub> Te <sub>4</sub> | -1.07956 | T-TiGe <sub>2</sub> Te <sub>4</sub> | -1.06497 | T-TiC <sub>2</sub> Te <sub>4</sub> | -0.43615 |
| T-VSi <sub>2</sub> As <sub>4</sub>  | -1.79358 | T-VGe <sub>2</sub> As <sub>4</sub>  | -1.89761 | T-VC <sub>2</sub> As <sub>4</sub>  | -1.78014 |
| T-VSi <sub>2</sub> N <sub>4</sub>   | -4.85948 | T-VGe <sub>2</sub> N <sub>4</sub>   | -4.13912 | T-VC <sub>2</sub> N <sub>4</sub>   | -3.70041 |
| T-VSi <sub>2</sub> P <sub>4</sub>   | -1.77239 | T-VGe <sub>2</sub> P <sub>4</sub>   | -1.76557 | T-VC <sub>2</sub> P <sub>4</sub>   | -2.04167 |
| T-VSi <sub>2</sub> S <sub>4</sub>   | -2.4109  | T-VGe <sub>2</sub> S <sub>4</sub>   | -2.38913 | T-VC <sub>2</sub> S <sub>4</sub>   | -1.68442 |
| T-VSi <sub>2</sub> Se <sub>4</sub>  | -1.65409 | T-VGe <sub>2</sub> Se <sub>4</sub>  | -1.78961 | T-VC <sub>2</sub> Se <sub>4</sub>  | -0.86798 |
| T-VSi <sub>2</sub> Te <sub>4</sub>  | -1.22613 | T-VGe <sub>2</sub> Te <sub>4</sub>  | -1.26821 | T-VC <sub>2</sub> Te <sub>4</sub>  | -0.64419 |
| T-WSi <sub>2</sub> As <sub>4</sub>  | -1.85038 | T-WGe <sub>2</sub> As <sub>4</sub>  | -1.90214 | T-WC <sub>2</sub> As <sub>4</sub>  | -1.74249 |
| T-WSi <sub>2</sub> N <sub>4</sub>   | -4.80486 | T-WGe <sub>2</sub> N <sub>4</sub>   | -4.09966 | T-WC <sub>2</sub> N <sub>4</sub>   | -3.55408 |
| T-WSi <sub>2</sub> P <sub>4</sub>   | -2.30652 | T-WGe <sub>2</sub> P <sub>4</sub>   | -2.15299 | T-WC <sub>2</sub> P <sub>4</sub>   | -2.00976 |
| T-WSi <sub>2</sub> S <sub>4</sub>   | -2.39804 | T-WGe <sub>2</sub> S <sub>4</sub>   | -2.43973 | T-WC <sub>2</sub> S <sub>4</sub>   | -1.56022 |
| T-WSi <sub>2</sub> Se <sub>4</sub>  | -1.6157  | T-WGe <sub>2</sub> Se <sub>4</sub>  | -1.67523 | T-WC <sub>2</sub> Se <sub>4</sub>  | -0.86096 |
| T-WSi <sub>2</sub> Te <sub>4</sub>  | -1.18264 | T-WGe <sub>2</sub> Te <sub>4</sub>  | -1.16778 | T-WC <sub>2</sub> Te <sub>4</sub>  | -0.51633 |
| T-NbSi <sub>2</sub> As <sub>4</sub> | -1.45194 | T-NbGe <sub>2</sub> As <sub>4</sub> | -1.56846 | T-NbC <sub>2</sub> As <sub>4</sub> | -1.4479  |
| T-NbSi <sub>2</sub> N <sub>4</sub>  | -4.53975 | T-NbGe <sub>2</sub> N <sub>4</sub>  | -3.87861 | T-NbC <sub>2</sub> N <sub>4</sub>  | -3.14413 |
| T-NbSi <sub>2</sub> P <sub>4</sub>  | -1.32485 | T-NbGe <sub>2</sub> P <sub>4</sub>  | -1.69598 | T-NbC <sub>2</sub> P <sub>4</sub>  | -1.65539 |
| T-NbSi <sub>2</sub> S <sub>4</sub>  | -2.18617 | T-NbGe <sub>2</sub> S <sub>4</sub>  | -1.78242 | T-NbC <sub>2</sub> S <sub>4</sub>  | -1.42672 |
| T-NbSi <sub>2</sub> Se <sub>4</sub> | -1.50848 | T-NbGe <sub>2</sub> Se <sub>4</sub> | -1.39576 | T-NbC <sub>2</sub> Se <sub>4</sub> | -0.58621 |
| T-NbSi <sub>2</sub> Te <sub>4</sub> | -1.51507 | T-NbGe <sub>2</sub> Te <sub>4</sub> | -0.79837 | T-NbC <sub>2</sub> Te <sub>4</sub> | -0.38353 |
| T-ZrSi <sub>2</sub> As <sub>4</sub> | -1.60182 | T-ZrGe <sub>2</sub> As <sub>4</sub> | -1.7262  | T-ZrC <sub>2</sub> As <sub>4</sub> | -1.58788 |
| T-ZrSi <sub>2</sub> N <sub>4</sub>  | -4.69926 | T-ZrGe <sub>2</sub> N <sub>4</sub>  | -4.12463 | T-ZrC <sub>2</sub> N <sub>4</sub>  | -3.08332 |
| T-ZrSi <sub>2</sub> P <sub>4</sub>  | -1.4071  | T-ZrGe <sub>2</sub> P <sub>4</sub>  | -1.44973 | T-ZrC <sub>2</sub> P <sub>4</sub>  | -1.73552 |
| T-ZrSi <sub>2</sub> S <sub>4</sub>  | -2.48172 | T-ZrGe <sub>2</sub> S <sub>4</sub>  | -2.49479 | T-ZrC <sub>2</sub> S <sub>4</sub>  | -1.67933 |
| T-ZrSi <sub>2</sub> Se <sub>4</sub> | -1.61098 | T-ZrGe <sub>2</sub> Se <sub>4</sub> | -1.68485 | T-ZrC <sub>2</sub> Se <sub>4</sub> | -0.79306 |
| T-ZrSi <sub>2</sub> Te <sub>4</sub> | -1.18479 | T-ZrGe <sub>2</sub> Te <sub>4</sub> | -1.07389 | T-ZrC <sub>2</sub> Te <sub>4</sub> | -0.50584 |

Table S3 Formation energy of asymmetric H-MA<sub>2</sub>Z<sub>4</sub> Janus structures

| Structure               | $E_f$ (eV) | Structure              | $E_f$ (eV) | Structure              | $E_f$ (eV) |
|-------------------------|------------|------------------------|------------|------------------------|------------|
| H-CrSiGeAs <sub>4</sub> | -1.36623   | H-CrCGeAs <sub>4</sub> | -1.59844   | H-CrSiCA <sub>4</sub>  | -1.66695   |
| H-CrSiGeN <sub>4</sub>  | -4.10545   | H-CrCGeN <sub>4</sub>  | -3.42759   | H-CrSiCN <sub>4</sub>  | -3.95802   |
| H-CrSiGeP <sub>4</sub>  | -1.52787   | H-CrCGeP <sub>4</sub>  | -1.66665   | H-CrSiCP <sub>4</sub>  | -1.85087   |
| H-CrSiGeS <sub>4</sub>  | -2.14441   | H-CrCGeS <sub>4</sub>  | -1.69714   | H-CrSiCS <sub>4</sub>  | -1.67321   |
| H-CrSiGeSe <sub>4</sub> | -1.45521   | H-CrCGeSe <sub>4</sub> | -1.02063   | H-CrSiCSe <sub>4</sub> | -1.00171   |
| H-CrSiGeTe <sub>4</sub> | -1.06429   | H-CrCGeTe <sub>4</sub> | -0.8259    | H-CrSiCTe <sub>4</sub> | -0.69743   |



|                         |          |                        |          |                        |          |
|-------------------------|----------|------------------------|----------|------------------------|----------|
| H-HfSiGeAs <sub>4</sub> | -1.80188 | H-HfCGeAs <sub>4</sub> | -1.78439 | H-HfSiCAs <sub>4</sub> | -1.85057 |
| H-HfSiGeN <sub>4</sub>  | -4.55369 | H-HfCGeN <sub>4</sub>  | -3.66795 | H-HfSiCN <sub>4</sub>  | -4.04652 |
| H-HfSiGeP <sub>4</sub>  | -1.58375 | H-HfCGeP <sub>4</sub>  | -1.83137 | H-HfSiCP <sub>4</sub>  | -1.94328 |
| H-HfSiGeS <sub>4</sub>  | -2.60136 | H-HfCGeS <sub>4</sub>  | -2.15277 | H-HfSiCS <sub>4</sub>  | -2.10656 |
| H-HfSiGeSe <sub>4</sub> | -1.91645 | H-HfCGeSe <sub>4</sub> | -1.46882 | H-HfSiCSe <sub>4</sub> | -1.39863 |
| H-HfSiGeTe <sub>4</sub> | -1.54028 | H-HfCGeTe <sub>4</sub> | -1.14284 | H-HfSiCTe <sub>4</sub> | -1.06871 |
| H-MoSiGeAs <sub>4</sub> | -1.58236 | H-MoCGeAs <sub>4</sub> | -1.63811 | H-MoSiCAs <sub>4</sub> | -1.70428 |
| H-MoSiGeN <sub>4</sub>  | -4.23105 | H-MoCGeN <sub>4</sub>  | -3.44157 | H-MoSiCN <sub>4</sub>  | -3.92125 |
| H-MoSiGeP <sub>4</sub>  | -2.04205 | H-MoCGeP <sub>4</sub>  | -1.75658 | H-MoSiCP <sub>4</sub>  | -1.87895 |
| H-MoSiGeS <sub>4</sub>  | -2.2499  | H-MoCGeS <sub>4</sub>  | -1.76548 | H-MoSiCS <sub>4</sub>  | -1.77623 |
| H-MoSiGeSe <sub>4</sub> | -1.54721 | H-MoCGeSe <sub>4</sub> | -1.09144 | H-MoSiCSe <sub>4</sub> | -1.06706 |
| H-MoSiGeTe <sub>4</sub> | -1.18682 | H-MoCGeTe <sub>4</sub> | -0.77586 | H-MoSiCTe <sub>4</sub> | -0.73034 |
| H-NbSiGeAs <sub>4</sub> | -1.50375 | H-ScCGeAs <sub>4</sub> | -1.46302 | H-ScSiCAs <sub>4</sub> | -1.53061 |
| H-NbSiGeN <sub>4</sub>  | -4.1886  | H-ScCGeN <sub>4</sub>  | -3.21557 | H-ScSiCN <sub>4</sub>  | -3.58331 |
| H-NbSiGeP <sub>4</sub>  | -1.3337  | H-ScCGeP <sub>4</sub>  | -1.405   | H-ScSiCP <sub>4</sub>  | -1.57326 |
| H-NbSiGeS <sub>4</sub>  | -2.22911 | H-ScCGeS <sub>4</sub>  | -1.85511 | H-ScSiCS <sub>4</sub>  | -1.75155 |
| H-NbSiGeSe <sub>4</sub> | -1.5304  | H-ScCGeSe <sub>4</sub> | -1.20225 | H-ScSiCSe <sub>4</sub> | -1.13049 |
| H-NbSiGeTe <sub>4</sub> | -1.17419 | H-ScCGeTe <sub>4</sub> | -0.89171 | H-ScSiCTe <sub>4</sub> | -0.8138  |
| H-ScSiGeAs <sub>4</sub> | -1.48104 | H-TaCGeAs <sub>4</sub> | -1.79874 | H-TaSiCAs <sub>4</sub> | -1.85904 |
| H-ScSiGeN <sub>4</sub>  | -3.93607 | H-TaCGeN <sub>4</sub>  | -3.66914 | H-TaSiCN <sub>4</sub>  | -4.10121 |
| H-ScSiGeP <sub>4</sub>  | -1.25656 | H-TaCGeP <sub>4</sub>  | -1.79773 | H-TaSiCP <sub>4</sub>  | -2.01707 |
| H-ScSiGeS <sub>4</sub>  | -2.30731 | H-TaCGeS <sub>4</sub>  | -2.06128 | H-TaSiCS <sub>4</sub>  | -2.03189 |
| H-ScSiGeSe <sub>4</sub> | -1.62742 | H-TaCGeSe <sub>4</sub> | -1.31135 | H-TaSiCSe <sub>4</sub> | -1.27265 |
| H-ScSiGeTe <sub>4</sub> | -1.28841 | H-TaCGeTe <sub>4</sub> | -1.01779 | H-TaSiCTe <sub>4</sub> | -0.94233 |
| H-TaSiGeAs <sub>4</sub> | -1.78539 | H-TiCGeAs <sub>4</sub> | -1.63682 | H-TiSiCAs <sub>4</sub> | -1.69721 |
| H-TaSiGeN <sub>4</sub>  | -4.51876 | H-TiCGeN <sub>4</sub>  | -3.5046  | H-TiSiCN <sub>4</sub>  | -3.95433 |
| H-TaSiGeP <sub>4</sub>  | -1.62439 | H-TiCGeP <sub>4</sub>  | -1.6395  | H-TiSiCP <sub>4</sub>  | -1.7968  |
| H-TaSiGeS <sub>4</sub>  | -2.51037 | H-TiCGeS <sub>4</sub>  | -1.92019 | H-TiSiCS <sub>4</sub>  | -1.88852 |
| H-TaSiGeSe <sub>4</sub> | -1.79234 | H-TiCGeSe <sub>4</sub> | -1.23887 | H-TiSiCSe <sub>4</sub> | -1.17979 |
| H-TaSiGeTe <sub>4</sub> | -1.40845 | H-TiCGeTe <sub>4</sub> | -0.92773 | H-TiSiCTe <sub>4</sub> | -0.85283 |
| H-TiSiGeAs <sub>4</sub> | -1.65926 | H-VCGeAs <sub>4</sub>  | -1.81125 | H-VSiCAs <sub>4</sub>  | -1.88248 |
| H-TiSiGeN <sub>4</sub>  | -4.30737 | H-VCGeN <sub>4</sub>   | -3.68159 | H-VSiCN <sub>4</sub>   | -4.17761 |
| H-TiSiGeP <sub>4</sub>  | -1.50932 | H-VCGeP <sub>4</sub>   | -1.85986 | H-VSiCP <sub>4</sub>   | -2.03935 |
| H-TiSiGeS <sub>4</sub>  | -2.27897 | H-VCGeS <sub>4</sub>   | -2.01622 | H-VSiCS <sub>4</sub>   | -1.99869 |
| H-TiSiGeSe <sub>4</sub> | -1.6376  | H-VCGeSe <sub>4</sub>  | -1.31813 | H-VSiCSe <sub>4</sub>  | -1.26749 |
| H-TiSiGeTe <sub>4</sub> | -1.21804 | H-VCGeTe <sub>4</sub>  | -1.02639 | H-VSiCTe <sub>4</sub>  | -0.95792 |
| H-VSiGeAs <sub>4</sub>  | -1.82414 | H-WCGeAs <sub>4</sub>  | -1.88417 | H-WSiCAs <sub>4</sub>  | -1.94967 |
| H-VSiGeN <sub>4</sub>   | -4.42516 | H-WCGeN <sub>4</sub>   | -3.78308 | H-WSiCN <sub>4</sub>   | -4.26092 |
| H-VSiGeP <sub>4</sub>   | -1.73073 | H-WCGeP <sub>4</sub>   | -2.03259 | H-WSiCP <sub>4</sub>   | -2.15376 |
| H-VSiGeS <sub>4</sub>   | -2.40363 | H-WCGeS <sub>4</sub>   | -2.05362 | H-WSiCS <sub>4</sub>   | -2.063   |
| H-VSiGeSe <sub>4</sub>  | -1.71578 | H-WCGeSe <sub>4</sub>  | -1.36187 | H-WSiCSe <sub>4</sub>  | -1.33768 |
| H-VSiGeTe <sub>4</sub>  | -3.171   | H-WCGeTe <sub>4</sub>  | -1.01684 | H-WSiCTe <sub>4</sub>  | -0.96323 |
| H-WSiGeAs <sub>4</sub>  | -1.84705 | H-NbCGeAs <sub>4</sub> | -1.50099 | H-NbSiCAs <sub>4</sub> | -1.60596 |
| H-WSiGeN <sub>4</sub>   | -4.58006 | H-NbCGeN <sub>4</sub>  | -3.34495 | H-NbSiCN <sub>4</sub>  | -3.77865 |
| H-WSiGeP <sub>4</sub>   | -2.31957 | H-NbCGeP <sub>4</sub>  | -1.6288  | H-NbSiCP <sub>4</sub>  | -1.74694 |
| H-WSiGeS <sub>4</sub>   | -2.3799  | H-NbCGeS <sub>4</sub>  | -1.80353 | H-NbSiCS <sub>4</sub>  | -1.77366 |

|                         |          |                        |          |                        |          |
|-------------------------|----------|------------------------|----------|------------------------|----------|
| H-WSiGeSe <sub>4</sub>  | -1.81506 | H-NbCGeSe <sub>4</sub> | -1.10172 | H-NbSiCSe <sub>4</sub> | -1.04456 |
| H-WSiGeTe <sub>4</sub>  | -1.41998 | H-NbCGeTe <sub>4</sub> | -0.78532 | H-NbSiCTe <sub>4</sub> | -0.71373 |
| H-ZrSiGeAs <sub>4</sub> | -1.65061 | H-ZrCGeAs <sub>4</sub> | -1.64529 | H-ZrSiCAs <sub>4</sub> | -1.72663 |
| H-ZrSiGeN <sub>4</sub>  | -4.32969 | H-ZrCGeN <sub>4</sub>  | -3.44086 | H-ZrSiCN <sub>4</sub>  | -3.80896 |
| H-ZrSiGeP <sub>4</sub>  | -2.10452 | H-ZrCGeP <sub>4</sub>  | -1.59924 | H-ZrSiCP <sub>4</sub>  | -1.80263 |
| H-ZrSiGeS <sub>4</sub>  | -2.41149 | H-ZrCGeS <sub>4</sub>  | -1.99426 | H-ZrSiCS <sub>4</sub>  | -1.94607 |
| H-ZrSiGeSe <sub>4</sub> | -1.76241 | H-ZrCGeSe <sub>4</sub> | -1.32332 | H-ZrSiCSe <sub>4</sub> | -1.25506 |
| H-ZrSiGeTe <sub>4</sub> | -1.40952 | H-ZrCGeTe <sub>4</sub> | -1.03285 | H-ZrSiCTe <sub>4</sub> | -0.95487 |

Table S4 Formation energy of asymmetric T-MA<sub>2</sub>Z<sub>4</sub> Janus structures

| Structure               | $E_f$ (eV) | Structure              | $E_f$ (eV) | Structure              | $E_f$ (eV) |
|-------------------------|------------|------------------------|------------|------------------------|------------|
| T-CrSiGeAs <sub>4</sub> | -1.59324   | T-CrCGeAs <sub>4</sub> | -1.56369   | T-CrSiCAs <sub>4</sub> | -1.62663   |
| T-CrSiGeN <sub>4</sub>  | -4.07856   | T-CrCGeN <sub>4</sub>  | -3.41207   | T-CrSiCN <sub>4</sub>  | -3.83853   |
| T-CrSiGeP <sub>4</sub>  | -1.88767   | T-CrCGeP <sub>4</sub>  | -1.65354   | T-CrSiCP <sub>4</sub>  | -1.79108   |
| T-CrSiGeS <sub>4</sub>  | -2.08851   | T-CrCGeS <sub>4</sub>  | -1.89621   | T-CrSiCS <sub>4</sub>  | -1.83343   |
| T-CrSiGeSe <sub>4</sub> | -1.45314   | T-CrCGeSe <sub>4</sub> | -1.14886   | T-CrSiCSe <sub>4</sub> | -0.97089   |
| T-CrSiGeTe <sub>4</sub> | -0.89211   | T-CrCGeTe <sub>4</sub> | -0.76139   | T-CrSiCTe <sub>4</sub> | -0.74577   |
| T-HfSiGeAs <sub>4</sub> | -1.812     | T-HfCGeAs <sub>4</sub> | -1.83824   | T-HfSiCAs <sub>4</sub> | -1.89724   |
| T-HfSiGeN <sub>4</sub>  | -4.61513   | T-HfCGeN <sub>4</sub>  | -3.6932    | T-HfSiCN <sub>4</sub>  | -4.06455   |
| T-HfSiGeP <sub>4</sub>  | -1.58474   | T-HfCGeP <sub>4</sub>  | -1.87852   | T-HfSiCP <sub>4</sub>  | -1.98977   |
| T-HfSiGeS <sub>4</sub>  | -2.63783   | T-HfCGeS <sub>4</sub>  | -2.26249   | T-HfSiCS <sub>4</sub>  | -2.20809   |
| T-HfSiGeSe <sub>4</sub> | -1.91767   | T-HfCGeSe <sub>4</sub> | -1.4733    | T-HfSiCSe <sub>4</sub> | -1.43856   |
| T-HfSiGeTe <sub>4</sub> | -1.25119   | T-HfCGeTe <sub>4</sub> | -0.98712   | T-HfSiCTe <sub>4</sub> | -0.9848    |
| T-MoSiGeAs <sub>4</sub> | -1.83865   | T-MoCGeAs <sub>4</sub> | -1.58361   | T-MoSiCAs <sub>4</sub> | -1.64624   |
| T-MoSiGeN <sub>4</sub>  | -4.08388   | T-MoCGeN <sub>4</sub>  | -3.30393   | T-MoSiCN <sub>4</sub>  | -3.77869   |
| T-MoSiGeP <sub>4</sub>  | -1.94876   | T-MoCGeP <sub>4</sub>  | -1.62043   | T-MoSiCP <sub>4</sub>  | -1.80545   |
| T-MoSiGeS <sub>4</sub>  | -2.13487   | T-MoCGeS <sub>4</sub>  | -1.76009   | T-MoSiCS <sub>4</sub>  | -1.76098   |
| T-MoSiGeSe <sub>4</sub> | -1.46604   | T-MoCGeSe <sub>4</sub> | -0.98835   | T-MoSiCSe <sub>4</sub> | -0.96936   |
| T-MoSiGeTe <sub>4</sub> | -0.89296   | T-MoCGeTe <sub>4</sub> | -0.69851   | T-MoSiCTe <sub>4</sub> | -0.69578   |
| T-NbSiGeAs <sub>4</sub> | -1.57146   | T-ScCGeAs <sub>4</sub> | -1.47432   | T-ScSiCAs <sub>4</sub> | -1.57574   |
| T-NbSiGeN <sub>4</sub>  | -4.16629   | T-ScCGeN <sub>4</sub>  | -3.35448   | T-ScSiCN <sub>4</sub>  | -3.72055   |
| T-NbSiGeP <sub>4</sub>  | -1.91651   | T-ScCGeP <sub>4</sub>  | -1.41799   | T-ScSiCP <sub>4</sub>  | -1.61195   |
| T-NbSiGeS <sub>4</sub>  | -2.20838   | T-ScCGeS <sub>4</sub>  | -2.00956   | T-ScSiCS <sub>4</sub>  | -1.93393   |
| T-NbSiGeSe <sub>4</sub> | -1.50284   | T-ScCGeSe <sub>4</sub> | -1.22012   | T-ScSiCSe <sub>4</sub> | -1.10121   |
| T-NbSiGeTe <sub>4</sub> | -0.93978   | T-ScCGeTe <sub>4</sub> | -0.72507   | T-ScSiCTe <sub>4</sub> | -0.66915   |
| T-ScSiGeAs <sub>4</sub> | -1.48293   | T-TaCGeAs <sub>4</sub> | -1.78487   | T-TaSiCAs <sub>4</sub> | -1.84647   |
| T-ScSiGeN <sub>4</sub>  | -4.01767   | T-TaCGeN <sub>4</sub>  | -3.6311    | T-TaSiCN <sub>4</sub>  | -4.06422   |
| T-ScSiGeP <sub>4</sub>  | -1.89887   | T-TaCGeP <sub>4</sub>  | -1.88281   | T-TaSiCP <sub>4</sub>  | -1.99984   |
| T-ScSiGeS <sub>4</sub>  | -2.27891   | T-TaCGeS <sub>4</sub>  | -2.094     | T-TaSiCS <sub>4</sub>  | -2.07424   |
| T-ScSiGeSe <sub>4</sub> | -1.63514   | T-TaCGeSe <sub>4</sub> | -1.30283   | T-TaSiCSe <sub>4</sub> | -1.2607    |
| T-ScSiGeTe <sub>4</sub> | -0.95849   | T-TaCGeTe <sub>4</sub> | -0.87775   | T-TaSiCTe <sub>4</sub> | -0.82831   |
| T-TaSiGeAs <sub>4</sub> | -1.8369    | T-TiCGeAs <sub>4</sub> | -1.66481   | T-TiSiCAs <sub>4</sub> | -1.73691   |
| T-TaSiGeN <sub>4</sub>  | -4.49585   | T-TiCGeN <sub>4</sub>  | -3.53526   | T-TiSiCN <sub>4</sub>  | -3.97939   |
| T-TaSiGeP <sub>4</sub>  | -1.69691   | T-TiCGeP <sub>4</sub>  | -1.67474   | T-TiSiCP <sub>4</sub>  | -1.84688   |
| T-TaSiGeS <sub>4</sub>  | -2.49377   | T-TiCGeS <sub>4</sub>  | -2.02092   | T-TiSiCS <sub>4</sub>  | -1.982     |
| T-TaSiGeSe <sub>4</sub> | -1.76544   | T-TiCGeSe <sub>4</sub> | -1.2406    | T-TiSiCSe <sub>4</sub> | -1.22313   |

|                         |          |                        |          |                        |          |
|-------------------------|----------|------------------------|----------|------------------------|----------|
| T-TaSiGeTe <sub>4</sub> | -0.93815 | T-TiCGeTe <sub>4</sub> | -0.81788 | T-TiSiCTe <sub>4</sub> | -0.80941 |
| T-TiSiGeAs <sub>4</sub> | -1.75798 | T-VCGeAs <sub>4</sub>  | -1.82913 | T-VSiCAs <sub>4</sub>  | -1.87554 |
| T-TiSiGeN <sub>4</sub>  | -4.37416 | T-VCGeN <sub>4</sub>   | -3.64982 | T-VSiCN <sub>4</sub>   | -4.14359 |
| T-TiSiGeP <sub>4</sub>  | -1.51387 | T-VCGeP <sub>4</sub>   | -1.89329 | T-VSiCP <sub>4</sub>   | -2.02708 |
| T-TiSiGeS <sub>4</sub>  | -1.93326 | T-VCGeS <sub>4</sub>   | -2.0634  | T-VSiCS <sub>4</sub>   | -2.05173 |
| T-TiSiGeSe <sub>4</sub> | -1.71227 | T-VCGeSe <sub>4</sub>  | -1.26178 | T-VSiCSe <sub>4</sub>  | -1.23422 |
| T-TiSiGeTe <sub>4</sub> | -1.10734 | T-VCGeTe <sub>4</sub>  | -0.93025 | T-VSiCTe <sub>4</sub>  | -0.8792  |
| T-VSiGeAs <sub>4</sub>  | -1.8489  | T-WCGeAs <sub>4</sub>  | -1.8274  | T-WSiCAs <sub>4</sub>  | -1.88769 |
| T-VSiGeN <sub>4</sub>   | -4.42421 | T-WCGeN <sub>4</sub>   | -3.62841 | T-WSiCN <sub>4</sub>   | -4.10095 |
| T-VSiGeP <sub>4</sub>   | -1.74859 | T-WCGeP <sub>4</sub>   | -1.95672 | T-WSiCP <sub>4</sub>   | -2.07714 |
| T-VSiGeS <sub>4</sub>   | -2.40557 | T-WCGeS <sub>4</sub>   | -2.01637 | T-WSiCS <sub>4</sub>   | -0.16581 |
| T-VSiGeSe <sub>4</sub>  | -1.74368 | T-WCGeSe <sub>4</sub>  | -1.2414  | T-WSiCSe <sub>4</sub>  | -1.22912 |
| T-VSiGeTe <sub>4</sub>  | -1.21655 | T-WCGeTe <sub>4</sub>  | -0.96134 | T-WSiCTe <sub>4</sub>  | -0.80058 |
| T-WSiGeAs <sub>4</sub>  | -1.86184 | T-NbCGeAs <sub>4</sub> | -1.53052 | T-NbSiCAs <sub>4</sub> | -1.59116 |
| T-WSiGeN <sub>4</sub>   | -4.4146  | T-NbCGeN <sub>4</sub>  | -3.31368 | T-NbSiCN <sub>4</sub>  | -3.74878 |
| T-WSiGeP <sub>4</sub>   | -2.22493 | T-NbCGeP <sub>4</sub>  | -1.60749 | T-NbSiCP <sub>4</sub>  | -1.72652 |
| T-WSiGeS <sub>4</sub>   | -2.4189  | T-NbCGeS <sub>4</sub>  | -1.84878 | T-NbSiCS <sub>4</sub>  | -1.80371 |
| T-WSiGeSe <sub>4</sub>  | -1.64655 | T-NbCGeSe <sub>4</sub> | -1.0368  | T-NbSiCSe <sub>4</sub> | -1.00669 |
| T-WSiGeTe <sub>4</sub>  | -0.95374 | T-NbCGeTe <sub>4</sub> | -0.64273 | T-NbSiCTe <sub>4</sub> | -0.59199 |
| T-ZrSiGeAs <sub>4</sub> | -1.83279 | T-ZrCGeAs <sub>4</sub> | -1.70415 | T-ZrSiCAs <sub>4</sub> | -1.76797 |
| T-ZrSiGeN <sub>4</sub>  | -4.37667 | T-ZrCGeN <sub>4</sub>  | -3.45851 | T-ZrSiCN <sub>4</sub>  | -3.82305 |
| T-ZrSiGeP <sub>4</sub>  | -2.11956 | T-ZrCGeP <sub>4</sub>  | -1.73073 | T-ZrSiCP <sub>4</sub>  | -1.84415 |
| T-ZrSiGeS <sub>4</sub>  | -2.45802 | T-ZrCGeS <sub>4</sub>  | -2.07956 | T-ZrSiCS <sub>4</sub>  | -2.04684 |
| T-ZrSiGeSe <sub>4</sub> | -2.09302 | T-ZrCGeSe <sub>4</sub> | -1.32428 | T-ZrSiCSe <sub>4</sub> | -1.27479 |
| T-ZrSiGeTe <sub>4</sub> | -1.09395 | T-ZrCGeTe <sub>4</sub> | -0.84266 | T-ZrSiCTe <sub>4</sub> | -0.79327 |

Table S5 The elastic constants of MA<sub>2</sub>Z<sub>4</sub> structures (in Nm<sup>-1</sup>)

| Structure                          | $C_{11}$ | $C_{12}$ | $C_{22}$ | $C_{44}$ | $C_{11}C_{22}-C_{12}^2$ |
|------------------------------------|----------|----------|----------|----------|-------------------------|
| H-CrSi <sub>2</sub> N <sub>4</sub> | 517.55   | 156.89   | 156.89   | 180.33   | 56583.01                |
| H-HfSi <sub>2</sub> N <sub>4</sub> | 466.43   | 153.54   | 153.54   | 156.44   | 48041.15                |
| H-MoSi <sub>2</sub> N <sub>4</sub> | 548.07   | 158.42   | 158.42   | 194.82   | 61728.60                |
| H-MoSi <sub>2</sub> P <sub>4</sub> | 219.20   | 56.79    | 56.79    | 81.21    | 9222.97                 |
| H-TaSi <sub>2</sub> N <sub>4</sub> | 523.57   | 163.91   | 163.91   | 179.83   | 58952.28                |
| H-TiSi <sub>2</sub> N <sub>4</sub> | 495.98   | 156.72   | 156.72   | 169.63   | 53169.81                |
| H-TiSi <sub>2</sub> P <sub>4</sub> | 189.62   | 46.40    | 46.40    | 71.61    | 6645.02                 |
| H-WSi <sub>2</sub> N <sub>4</sub>  | 568.24   | 158.30   | 158.30   | 204.97   | 64893.70                |
| H-WSi <sub>2</sub> P <sub>4</sub>  | 223.95   | 54.53    | 54.53    | 84.71    | 9238.59                 |
| H-ZrSi <sub>2</sub> N <sub>4</sub> | 442.01   | 144.25   | 144.25   | 148.88   | 42952.16                |
| H-HfGe <sub>2</sub> N <sub>4</sub> | 405.60   | 142.67   | 142.67   | 131.46   | 37511.60                |
| H-MoGe <sub>2</sub> N <sub>4</sub> | 443.25   | 145.43   | 145.43   | 148.91   | 43311.54                |
| H-WGe <sub>2</sub> N <sub>4</sub>  | 460.18   | 144.96   | 144.96   | 157.61   | 45693.98                |
| H-ZrGe <sub>2</sub> N <sub>4</sub> | 382.10   | 133.53   | 133.53   | 124.28   | 33192.34                |
| T-HfSi <sub>2</sub> N <sub>4</sub> | 464.62   | 123.57   | 123.57   | 171.05   | 42143.94                |
| T-ScSi <sub>2</sub> N <sub>4</sub> | 395.96   | 131.62   | 131.62   | 126.15   | 34793.40                |
| T-ScSi <sub>2</sub> P <sub>4</sub> | 168.06   | 47.77    | 47.77    | 36.17    | 5746.08                 |
| T-TaSi <sub>2</sub> N <sub>4</sub> | 481.74   | 143.83   | 143.83   | 158.79   | 48601.61                |
| T-ZrSi <sub>2</sub> N <sub>4</sub> | 442.34   | 117.44   | 117.44   | 163.29   | 38155.03                |
| T-HfGe <sub>2</sub> N <sub>4</sub> | 413.47   | 124.29   | 124.29   | 145.82   | 35941.36                |

|                                    |        |        |        |         |           |
|------------------------------------|--------|--------|--------|---------|-----------|
| T-NbGe <sub>2</sub> N <sub>4</sub> | 397.98 | 126.40 | 126.40 | 133.07  | 34328.11  |
| T-ScGe <sub>2</sub> N <sub>4</sub> | 334.35 | 123.01 | 123.01 | 102.81  | 25996.62  |
| T-TaGe <sub>2</sub> N <sub>4</sub> | 404.93 | 127.26 | 127.26 | 134.66  | 35336.89  |
| T-ZrGe <sub>2</sub> N <sub>4</sub> | 394.02 | 118.84 | 118.84 | 138.61  | 32702.38  |
| H-HfSiGeN <sub>4</sub>             | 429.53 | 146.72 | 146.72 | 141.41  | 41494.03  |
| H-MoSiGeN <sub>4</sub>             | 489.65 | 148.53 | 148.53 | 170.56  | 50665.94  |
| H-MoSiGeP <sub>4</sub>             | 209.34 | 57.97  | 57.97  | 75.68   | 8775.22   |
| H-NbSiGeP <sub>4</sub>             | 35.84  | 230.92 | 230.92 | -97.54  | -45048.92 |
| H-TaSiGeN <sub>4</sub>             | 480.88 | 154.51 | 154.51 | 163.18  | 50427.10  |
| H-TiSiGeN <sub>4</sub>             | 444.87 | 145.44 | 145.44 | 149.71  | 43549.51  |
| H-WSiGeN <sub>4</sub>              | 512.16 | 150.39 | 150.39 | 180.88  | 54407.10  |
| H-WSiGeP <sub>4</sub>              | 214.60 | 56.18  | 56.18  | 79.21   | 8900.31   |
| H-ZrSiGeN <sub>4</sub>             | 407.09 | 138.69 | 138.69 | 134.20  | 37224.92  |
| H-CrSiCAs <sub>4</sub>             | 192.83 | 61.73  | 61.73  | 65.55   | 8092.93   |
| H-CrSiCN <sub>4</sub>              | 473.42 | 155.51 | 155.51 | 158.96  | 49438.51  |
| H-CrSiCP <sub>4</sub>              | 235.59 | 59.62  | 59.62  | 87.99   | 10490.86  |
| H-MoSiCAs <sub>4</sub>             | 196.71 | 50.58  | 50.58  | 73.06   | 7391.02   |
| H-MoSiCP <sub>4</sub>              | 234.37 | 49.75  | 49.75  | 92.31   | 9185.21   |
| H-NbSiCAs <sub>4</sub>             | 149.93 | 72.07  | 72.07  | 38.93   | 5611.62   |
| H-NbSiCP <sub>4</sub>              | 206.44 | 72.98  | 72.98  | 66.73   | 9740.14   |
| H-TaSiCAs <sub>4</sub>             | 123.55 | 80.20  | 80.20  | 21.68   | 3477.04   |
| H-TaSiCP <sub>4</sub>              | 189.35 | 85.54  | 85.54  | 51.91   | 8880.02   |
| H-TiSiCP <sub>4</sub>              | 89.07  | -1.24  | -1.24  | 45.15   | -111.54   |
| H-VSiCAs <sub>4</sub>              | 140.90 | 63.73  | 63.73  | 38.58   | 4917.91   |
| H-VSiCN <sub>4</sub>               | 432.40 | 166.79 | 166.79 | 132.80  | 44300.91  |
| H-VSiCP <sub>4</sub>               | 184.79 | 66.83  | 66.83  | 58.98   | 7883.03   |
| H-WSiCAs <sub>4</sub>              | 199.42 | 45.30  | 45.30  | 77.06   | 6981.25   |
| H-WSiCP <sub>4</sub>               | 235.01 | 46.33  | 46.33  | 94.34   | 8742.20   |
| H-MoCGeAs <sub>4</sub>             | 170.58 | 55.07  | 55.07  | 57.76   | 6361.23   |
| H-NbCGeP <sub>4</sub>              | 203.62 | 55.33  | 55.33  | 74.14   | 8205.10   |
| H-TaCGeAs <sub>4</sub>             | 156.05 | 49.48  | 49.48  | 53.29   | 5273.52   |
| H-WCGeAs <sub>4</sub>              | 171.23 | 52.11  | 52.11  | 59.56   | 6207.23   |
| T-HfSiGeN <sub>4</sub>             | 428.46 | 117.91 | 117.91 | 154.74  | 36616.82  |
| T-ScSiGeN <sub>4</sub>             | 352.19 | 117.86 | 117.86 | 116.57  | 27618.56  |
| T-ScSiGeP <sub>4</sub>             | 149.64 | 54.51  | 54.51  | 25.18   | 5185.22   |
| T-TaSiGeN <sub>4</sub>             | 437.27 | 126.54 | 126.54 | 154.67  | 39319.86  |
| T-ZrSiGeN <sub>4</sub>             | 408.71 | 112.71 | 112.71 | 147.55  | 33361.87  |
| T-HfSiCAs <sub>4</sub>             | 109.41 | 31.28  | 31.28  | 38.50   | 2443.92   |
| T-HfSiCP <sub>4</sub>              | 104.38 | 34.99  | 34.99  | -185.26 | 2427.81   |
| T-ScSiCP <sub>4</sub>              | 132.56 | 36.63  | 36.63  | 54.54   | 3514.13   |
| T-TiSiCAs <sub>4</sub>             | 71.27  | 88.40  | 88.40  | -14.97  | -1513.51  |
| T-TiSiCP <sub>4</sub>              | 138.81 | 50.56  | 50.56  | -30.98  | 4461.68   |
| T-ZrSiCP <sub>4</sub>              | 111.52 | 67.29  | 67.29  | -580.09 | 2975.96   |

Table S6 Effective mass ( $m^*$ ), elastic modulus ( $C_{2D}$ ), variable situation constant  $E_i$  and carrier mobility ( $\mu_{2D}$ ) in the xy direction for electrons and holes

| Structure name                     |          | $m^*_x/m_0$ | $m^*_y/m_0$ | $E_{ix}$ (eV) | $E_{iy}$ (eV) | $C_{2Dx}$ (eV) | $C_{2Dy}$ (eV) | $\mu_x$ (cm <sup>2</sup> /(Vs)) | $\mu_y$ (cm <sup>2</sup> /(Vs)) |
|------------------------------------|----------|-------------|-------------|---------------|---------------|----------------|----------------|---------------------------------|---------------------------------|
| H-HfSi <sub>2</sub> N <sub>4</sub> | electron | 0.80        | 0.86        | 452.55        | 452.41        | 2.94           | 2.93           | 1.17E+03                        | 1.01E+03                        |
|                                    | hole     | 2.35        | 2.48        | 452.55        | 452.41        | 2.47           | 2.67           | 1.90E+02                        | 1.47E+02                        |
| H-MoSi <sub>2</sub> N <sub>4</sub> | electron | 0.43        | 0.44        | 540.10        | 539.35        | 2.86           | 2.51           | 5.17E+03                        | 6.42E+03                        |
|                                    | hole     | 1.63        | 1.63        | 540.10        | 539.35        | 5.41           | 5.40           | 9.86E+01                        | 9.92E+01                        |

|                                    |          |       |       |        |        |      |      |          |          |
|------------------------------------|----------|-------|-------|--------|--------|------|------|----------|----------|
| H-MoSi <sub>2</sub> P <sub>4</sub> | electron | 0.32  | 0.33  | 221.09 | 220.41 | 4.51 | 4.31 | 1.48E+03 | 1.53E+03 |
|                                    | hole     | 0.34  | 0.38  | 221.09 | 220.41 | 2.16 | 2.43 | 5.90E+03 | 3.75E+03 |
| H-TaSi <sub>2</sub> N <sub>4</sub> | electron | 0.83  | 0.83  | 492.28 | 495.83 | 8.59 | 8.76 | 1.38E+02 | 1.33E+02 |
|                                    | hole     | 1.06  | 5.15  | 492.28 | 495.83 | 6.73 | 5.93 | 1.38E+02 | 7.56E+00 |
| H-TiSi <sub>2</sub> N <sub>4</sub> | electron | 1.44  | 3.26  | 471.90 | 471.89 | 3    | 4.08 | 3.61E+02 | 3.80E+01 |
|                                    | hole     | 3.84  | 1.13  | 471.90 | 471.89 | 3.47 | 3.05 | 3.78E+01 | 5.66E+02 |
| H-TiSi <sub>2</sub> P <sub>4</sub> | electron | 0.62  | 0.24  | 193.76 | 191.52 | 0.89 | 0.80 | 9.08E+03 | 7.27E+04 |
|                                    | hole     | 1.09  | 0.94  | 193.76 | 191.52 | 4.63 | 4.54 | 1.08E+02 | 1.51E+02 |
| H-WSi <sub>2</sub> N <sub>4</sub>  | electron | 0.34  | 0.34  | 565.23 | 564.82 | 3.72 | 3.91 | 4.98E+03 | 4.66E+03 |
|                                    | hole     | 1.53  | 1.52  | 565.23 | 564.82 | 5.64 | 5.05 | 1.08E+02 | 1.37E+02 |
| H-WSi <sub>2</sub> P <sub>4</sub>  | electron | 0.18  | 0.19  | 228.38 | 227.89 | 3.72 | 4.14 | 7.10E+03 | 5.42E+03 |
|                                    | hole     | 0.24  | 0.24  | 228.38 | 227.89 | 2.43 | 2.40 | 9.53E+03 | 9.61E+03 |
| H-ZrSi <sub>2</sub> N <sub>4</sub> | electron | 2.30  | 1.37  | 431.38 | 430.36 | 2.26 | 2.59 | 2.27E+02 | 4.88E+02 |
|                                    | hole     | 3.61  | 2.26  | 431.38 | 430.36 | 3.95 | 3.97 | 3.02E+01 | 7.60E+01 |
| T-HfSi <sub>2</sub> N <sub>4</sub> | electron | 0.52  | 0.24  | 492.89 | 491.44 | 5.1  | 5.79 | 1.00E+03 | 3.50E+03 |
|                                    | hole     | -1.09 | 1.08  | 492.89 | 491.44 | 3.52 | 3.04 | 4.74E+02 | 6.43E+02 |
| T-ZrSi <sub>2</sub> N <sub>4</sub> | electron | 0.54  | 0.25  | 471.67 | 470.46 | 3.95 | 4.77 | 1.46E+03 | 4.74E+03 |
|                                    | hole     | -1.10 | -1.4  | 471.67 | 470.46 | 3.51 | 3.23 | 4.48E+02 | 3.30E+02 |
| H-HfGe <sub>2</sub> N <sub>4</sub> | electron | 0.72  | 2.2   | 383.63 | 381.39 | 2.17 | 2.00 | 2.26E+03 | 2.78E+02 |
|                                    | hole     | 1.86  | 1.8   | 383.63 | 381.39 | 3.09 | 3.13 | 1.66E+02 | 1.71E+02 |
| H-MoGe <sub>2</sub> N <sub>4</sub> | electron | 0.38  | 0.39  | 434.55 | 433.35 | 2.02 | 2.81 | 1.03E+04 | 5.11E+03 |
|                                    | hole     | 1.10  | 1.1   | 434.55 | 433.35 | 3.5  | 3.43 | 4.21E+02 | 4.38E+02 |
| H-WGe <sub>2</sub> N <sub>4</sub>  | electron | 0.30  | 0.31  | 457.89 | 457.19 | 2.86 | 2.50 | 8.61E+03 | 1.09E+04 |
|                                    | hole     | 0.80  | 0.8   | 457.89 | 457.19 | 3.4  | 3.32 | 8.77E+02 | 9.22E+02 |
| H-ZrGe <sub>2</sub> N <sub>4</sub> | electron | 1.50  | 1.7   | 364.79 | 362.43 | 3.35 | 3.50 | 2.04E+02 | 1.45E+02 |
|                                    | hole     | 1.77  | 1.52  | 364.79 | 362.43 | 2.78 | 2.81 | 2.15E+02 | 2.81E+02 |
| T-HfGe <sub>2</sub> N <sub>4</sub> | electron | 0.21  | 0.21  | 416.89 | 415.66 | 8.47 | 8.62 | 1.86E+03 | 1.79E+03 |
|                                    | hole     | 1.29  | 0.97  | 416.89 | 415.66 | 2.28 | 2.05 | 6.84E+02 | 1.50E+03 |
| T-ScGe <sub>2</sub> N <sub>4</sub> | electron | 0.45  | -0.99 | 413.62 | 413.16 | 3.98 | 3.56 | 1.80E+03 | 4.79E+02 |
|                                    | hole     | 0.65  | 0.66  | 413.62 | 413.16 | 4.64 | 4.29 | 6.46E+02 | 7.42E+02 |
| T-ZrGe <sub>2</sub> N <sub>4</sub> | electron | 0.31  | 0.65  | 401.27 | 400.01 | 3.84 | 3.72 | 4.08E+03 | 9.67E+02 |
|                                    | hole     | -0.97 | -1.03 | 401.27 | 400.01 | 4.54 | 4.54 | 2.94E+02 | 2.58E+02 |
| H-HfSiGeN <sub>4</sub>             | electron | 0.78  | 0.86  | 414.51 | 414.32 | 3.08 | 2.98 | 1.04E+03 | 8.93E+02 |
|                                    | hole     | 2.91  | 2.97  | 414.51 | 414.32 | 3.23 | 3.49 | 6.66E+01 | 5.50E+01 |
| H-MoSiGeN <sub>4</sub>             | electron | 0.40  | 0.41  | 484.97 | 484.22 | 1.94 | 1.63 | 1.16E+04 | 1.56E+04 |
|                                    | hole     | -6.20 | -6.2  | 484.97 | 484.22 | 4.79 | 4.74 | 7.83E+00 | 7.96E+00 |
| H-MoSiGeP <sub>4</sub>             | electron | 0.33  | 0.33  | 209.52 | 209.20 | 4.04 | 4.06 | 1.73E+03 | 1.62E+03 |
|                                    | hole     | 0.34  | 0.37  | 209.52 | 209.20 | 2.31 | 2.56 | 4.99E+03 | 3.25E+03 |
| H-TaSiGeN <sub>4</sub>             | electron | 1.57  | 1.8   | 468.55 | 476.69 | 3.27 | 2.51 | 2.52E+02 | 3.30E+02 |
|                                    | hole     | 1.52  | 1.27  | 468.55 | 476.69 | 4.27 | 3.79 | 1.58E+02 | 2.93E+02 |
| H-TiSiGeN <sub>4</sub>             | electron | 2.11  | 3     | 427.59 | 426.66 | 4.11 | 3.34 | 8.08E+01 | 6.04E+01 |
|                                    | hole     | 2.44  | 1.33  | 427.59 | 426.66 | 4.32 | 4.75 | 5.50E+01 | 1.51E+02 |
| H-WSiGeN <sub>4</sub>              | electron | 0.32  | 0.32  | 511.54 | 509.90 | 2.89 | 2.55 | 8.44E+03 | 1.09E+04 |
|                                    | hole     | 16.50 | 16.84 | 511.54 | 509.90 | 4.81 | 4.70 | 1.15E+00 | 1.16E+00 |
| H-WSiGeP <sub>4</sub>              | electron | 0.21  | 0.2   | 216.98 | 215.76 | 3.98 | 3.64 | 4.34E+03 | 5.79E+03 |
|                                    | hole     | 0.24  | 0.24  | 216.98 | 215.76 | 2.37 | 2.78 | 9.30E+03 | 6.69E+03 |
| H-ZrSiGeN <sub>4</sub>             | electron | 1.64  | 1.92  | 394.27 | 393.35 | 3.77 | 3.97 | 1.47E+02 | 9.60E+01 |
|                                    | hole     | 2.19  | 2.33  | 394.27 | 393.35 | 3.17 | 3.37 | 1.16E+02 | 9.10E+01 |
| T-HfSiGeN <sub>4</sub>             | electron | 0.56  | 0.27  | 449.62 | 449.21 | 2.32 | 5.72 | 3.75E+03 | 2.70E+03 |
|                                    | hole     | 1.08  | 1.11  | 449.62 | 449.21 | 8.61 | 8.75 | 7.41E+01 | 6.82E+01 |
| T-ZrSiGeN <sub>4</sub>             | electron | 0.22  | 0.61  | 431.75 | 431.04 | 3.48 | 2.68 | 1.01E+04 | 2.31E+03 |
|                                    | hole     | 1.01  | 1.28  | 431.75 | 431.04 | 5.34 | 5.48 | 2.11E+02 | 1.25E+02 |
| H-CrSiCN <sub>4</sub>              | electron | 0.95  | 1.03  | 490.90 | 478.38 | 6.93 | 6.62 | 1.62E+02 | 1.48E+02 |
|                                    | hole     | 0.95  | 1.05  | 490.90 | 478.38 | 3.45 | 3.68 | 6.56E+02 | 4.55E+02 |
| H-CrSiCP <sub>4</sub>              | electron | 0.25  | 0.76  | 224.25 | 228.76 | 1.25 | 2.12 | 3.33E+04 | 1.27E+03 |
|                                    | hole     | 0.51  | 0.6   | 224.25 | 228.76 | 2.05 | 2.53 | 2.98E+03 | 1.40E+03 |
| H-VSiCN <sub>4</sub>               | electron | 0.72  | 0.82  | 372.21 | 371.14 | 3    | 3.13 | 1.13E+03 | 8.01E+02 |
|                                    | hole     | 5.55  | 0.99  | 372.21 | 371.14 | 2.9  | 2.47 | 2.04E+01 | 8.83E+02 |

## References

- 1 Atsushi, Togo, Fumiyasu, Oba, Isao and Tanaka, *Phys. Rev. B*, 2008, **78** 134106.
- 2 X. Gonze and C. Lee, *Phys. Rev. B*, 1997, **55**, 10355--10368.
- 3 V. Wang, N. Xu, J.-C. Liu, G. Tang and W.-T. Geng, *Comput. Phys. Commun.*, 2021, **267**, 108033.
- 4 J. K. Nørskov, J. Rossmeisl, A. Logadottir, L. Lindqvist, J. R. Kitchin, T. Bligaard and H. Jónsson, *J. Phys. Chem. B*, 2004, **108**, 17886-17892.
